# Supplementary material for: Semiquantitative Analysis of Clinical Heat Stress in Clostridium difficile Strain 630 Using a GeLC/MS Workflow with emPAI Quantitation
Source: PLoS One. 2014 Feb 24;9(2):e88960. doi: 10.1371/journal.pone.0088960 (PMC3933415; doi:10.1371/journal.pone.0088960)
Supplement: Table S2 — Overall 41°C proteome with emPAI and bioinformatics analysis xls file. (XLS) [file pone.0088960.s007.xls]

## Sheet: all 41
No.	Acc No.	locus	Genbank	gene	Protein	MOWSE	No. Pep	Coverage	Mol Wt. (kD)	pI	PSORTb	SignalP	SecretomeP	PAI	emPAI	Molar%	No. Observable Pep
1	gi115251733	CD2682	CAJ69568.1	pfo	pyruvate-flavodoxin oxidoreductase	2383	41	37	128.9	5.58	Cytoplasmic	No	No	0.640625	3.37144	1.83365	64
2	gi115249074	CD0070	CAJ66885.1	fusA	translation elongation factor G	1261	22	38	75.91	5	Cytoplasmic	No	No	0.564103	2.66524	1.44956	39
3	gi115251515	CD2461	CAJ69348.1	dnaK	chaperone protein dnaK (Heat shock protein 70)	1259	21	44	66.48	4.85	Cytoplasmic	No	Yes 0.50223	0.381818	1.4089	0.766267	55
4	gi115252023	CD2966	CAJ69859.1	adhE	aldehyde-alcohol dehydrogenase	1136	20	29	94.68	5.88	Cytoplasmic	No	No	0.298507	0.988417	0.537578	67
5	gi115252231	CD3174	CAJ70071.1	gapA	glyceraldehyde-3-phosphate dehydrogenase 2	1100	18	44	36.04	6	Cytoplasmic	No	No	0.666667	3.64159	1.98058	27
6	gi115249401	CD0395	CAJ67216.1	hadA	isocaprenoyl-CoA:2-hydroxyisocaproate CoA-transferase	1078	22	50	44.24	5.3	Cytoplasmic	No	No	0.814815	5.52852	3.00684	27
7	gi115249189	CD0179	CAJ67001.1	gluD	NAD-specific glutamate dehydrogenase	1022	19	48	46.02	5.23	Cytoplasmic	No	No	0.612903	3.10113	1.68663	31
8	gi115249409	CD0403	CAJ67224.1	fba	putative fructose-bisphosphate aldolase	960	16	40	32.92	5.33	Cytoplasmic	No	No	0.727273	4.3367	2.35863	22
9	gi115250080	CD1059	CAJ67900.1	thlA1	acetyl-CoA acetyltransferase (Acetoacetyl-CoA thiolase 1 [)	891	15	39	40.86	5.31	Cytoplasmic	No	No	0.833333	5.81292	3.16152	18
10	gi115249204	CD0194	CAJ67016.1	groL	60 kDa chaperonin GroEL	857	15	33	57.78	4.81	Cytoplasmic	No	No	0.365854	1.32195	0.718981	41
11	gi115252227	CD3170	CAJ70067.1	eno	enolase ((2-phosphoglycerate dehydratase) )	857	12	34	46.1	4.66	Cytoplasmic	No	No	0.521739	2.3246	1.2643	23
12	gi115252454	CD3394	CAJ70297.1	pyk	pyruvate kinase	855	16	31	63.12	5.11	Cytoplasmic	No	No	0.533333	2.41455	1.31322	30
13	gi115250076	CD1055	CAJ67896.1	etfB2	electron transfer flavoprotein beta-subunit	809	15	45	28.91	4.95	Cytoplasmic	No	No	0.681818	3.80638	2.0702	22
14	gi115249404	CD0398	CAJ67219.1	hadC	subunit of oxygen-sensitive 2-hydroxyisocaproyl-CoA dehydratase	785	14	40	42.37	5.39	Cytoplasmic	No	No	0.466667	1.92864	1.04895	30
15	gi115250565	CD1524	CAJ68389.1		putative rubrerythrin	778	12	61	19.99	5.63	Cytoplasmic	No	No	0.923077	7.37678	4.01206	13
16	gi115249407	CD0401	CAJ67222.1	etfA1	electron transfer flavoprotein alpha-subunit	714	14	44	37.15	5.2	Cytoplasmic	No	No	0.636364	3.32876	1.81044	22
17	gi115249053	CD0050	CAJ66864.1	proS	putative dual-specificity prolyl/cysteinyl-tRNA synthetase	703	14	32	55.15	5.41	Cytoplasmic	No	No	0.4	1.51189	0.822281	35
18	gi115250515	CD1474	CAJ68339.1		putative ruberythrin	688	10	56	20.01	5.49	Cytoplasmic	No	No	0.625	3.21697	1.74963	16
19	gi115249776	CD0759	CAJ67593.1	plfB	formate acetyltransferase	686	13	17	83.57	5.58	Cytoplasmic	No	No	0.393939	1.47708	0.803348	33
20	gi115249405	CD0399	CAJ67220.1	acdB	acyl-CoA dehydrogenase, short-chain specific	662	11	31	40.87	6.82	Cytoplasmic	No	No	0.423077	1.64897	0.896837	26
21	gi115249282	CD0273	CAJ67095.1	htpG	chaperone protein (heat shock protein 90, htpG)	658	12	23	74.93	4.99	Cytoplasmic	No	No	0.193548	0.561523	0.3054	62
22	gi115252229	CD3172	CAJ70069.1	tpi	triosephosphate isomerase	635	10	47	27.2	5.14	Cytoplasmic	No	No	0.625	3.21697	1.74963	16
23	gi115250843	CD1797	CAJ68667.1		putative pyridine nucleotide-disulfide oxidoreductase (CoA-disulfide reductase)	629	11	22	58.7	5.65	Cytoplasmic	No	No	0.611111	3.08424	1.67745	18
24	gi115252729	CD3664	CAJ70573.1		putative amino acid aminotransferase	579	12	33	44.8	5.19	Cytoplasmic	No	No	0.444444	1.78256	0.969494	27
25	gi115250578	CD1537	CAJ68402.1	aspB	putative glutamate synthase [NADPH] small chain	571	9	27	49.6	5.21	Cytoplasmic	No	No	0.264706	0.839526	0.456599	34
26	gi115250079	CD1058	CAJ67899.1	hbd	3-hydroxybutyryl-CoA dehydrogenase	556	10	37	30.68	6.16	Unknown	No	No	0.526316	2.35982	1.28345	19
27	gi115249129	CD0120	CAJ66940.1	glmS	glucosamine--fructose-6-phosphate aminotransferase [isomerizing]	542	9	21	67.43	5.31	Cytoplasmic	No	No	0.272727	0.873817	0.475249	33
28	gi115249724	CD0708	CAJ67541.1	pepD	putative aminoacyl-histidine dipeptidase	541	10	26	52.56	5	Cytoplasmic	No	No	0.357143	1.27585	0.693904	28
29	gi115251846	CD2793	CAJ69681.1	slpA	cell surface protein (S-layer precursor protein)	534	9	17	76.14	4.95	Cell wall	Yes VFA-AT 24-25	Yes 0.863011	0.160714	0.447819	0.243559	56
30	gi115249406	CD0400	CAJ67221.1	etfB1	electron transfer flavoprotein beta-subunit	521	8	43	28.68	5.03	Cytoplasmic	No	No	0.307692	1.03092	0.560693	26
31	gi115249073	CD0069	CAJ66884.1	rpsG	30S ribosomal protein S7	488	7	40	17.67	9.92	Cytoplasmic	No	No	0.35	1.23872	0.673712	20
32	gi115251384	CD2329	CAJ69216.1	tal	putative transaldolase	422	8	46	23.4	5.46	Cytoplasmic	No	No	0.235294	0.719072	0.391087	34
33	gi115252455	CD3395	CAJ70298.1	pfkA	6-phosphofructokinase	416	7	27	34.21	7.41	Cytoplasmic	No	No	0.259259	0.8166	0.44413	27
34	gi115250077	CD1056	CAJ67897.1	etfA1	electron transfer flavoprotein alpha-subunit	410	8	32	36.08	5.23	Cytoplasmic	No	No	0.296296	0.978319	0.532085	27
35	gi115249113	CD0105	CAJ66924.1	rpsI	30S ribosomal protein S9	378	6	48	14.55	10.4	Unknown	No	No	0.352941	1.25393	0.681986	17
36	gi115249342	CD0333	CAJ67155.1	ppaC	manganese-dependent inorganic pyrophosphatase	378	7	16	59.3	5.05	Cytoplasmic	No	No	0.21875	0.654817	0.35614	32
37	gi115249403	CD0397	CAJ67218.1	hadB	subunit of oxygen-sensitive 2-hydroxyisocaproyl-CoA dehydratase	376	8	19	46.6	5.06	Cytoplasmic	No	No	0.333333	1.15443	0.627871	24
38	gi115249091	CD0085	CAJ66902.1	rpsH	30S ribosomal protein S8	364	8	49	14.68	9.21	Cytoplasmic	No	No	0.470588	1.95521	1.06339	17
39	gi115252300	CD3244	CAJ70141.1	prdA	D-proline reductase subunit proprotein	358	7	14	67.63	4.73	Cytoplasmic	No	No	0.269231	0.858792	0.467077	26
40	gi115251390	CD2335	CAJ69222.1	guaB	inosine-5'-monophosphate dehydrogenase	348	6	16	54.78	5.52	Cytoplasmic	No	No	0.176471	0.501311	0.272652	34
41	gi115249203	CD0193	CAJ67015.1	groS	10 kDa chaperonin (Protein Cpn10) (GroES protein)	342	6	59	10.22	5.04	Cytoplasmic	No	No	0.5	2.16228	1.17601	12
42	gi115249098	CD0091	CAJ66909.1	adk	adenylate kinase	310	7	40	23.7	5.53	Cytoplasmic	No	No	0.411765	1.58086	0.859795	17
43	gi115249197	CD0187	CAJ67009.1	pyrE	orotate phosphoribosyltransferase	309	5	34	21.3	6	Cytoplasmic	No	No	0.238095	0.730196	0.397137	21
44	gi115252361	CD3305	CAJ70202.1	clpP1	ATP-dependent Clp protease proteolytic subunit	296	6	26	21.3	5.28	Cytoplasmic	No	No	0.6	2.98107	1.62134	10
45	gi115252341	CD3285	CAJ70182.1	pgi	glucose-6-phosphate isomerase	291	6	14	50.54	5.7	Cytoplasmic	No	No	0.230769	0.701254	0.381396	26
46	gi115249103	CD0095	CAJ66914.1	rpsM	30S ribosomal protein S13	290	5	30	14.09	10.3	Cytoplasmic	No	No	0.277778	0.895736	0.48717	18
47	gi115249105	CD0097	CAJ66916.1	rpsD	30S ribosomal protein S4	290	5	23	23.57	9.75	Cytoplasmic	No	No	0.151515	0.417474	0.227055	33
48	gi115249127	CD0118	CAJ66938.1		putative subunit of oxidoreductase (ferredoxin/flavodoxin oxidoreductase,gamma subunit)	278	5	28	19.79	5.08	Cytoplasmic	No	No	0.384615	1.42446	0.774733	13
49	gi115252282	CD3225	CAJ70123.1	dapA3	dihydrodipicolinate synthase	277	5	23	31.6	4.89	Cytoplasmic	No	No	0.384615	1.42446	0.774733	13
50	gi115251115	CD2061	CAJ68946.1		conserved hypothetical protein (DUF1121 family)	275	5	25	23.86	7.89	Cytoplasmic	No	No	0.172414	0.487352	0.26506	29
51	gi115251499	CD2446	CAJ69332.1	rpsU	putative tRNA binding protein	270	6	36	17.08	6.89	Cytoplasmic	No	No	0.24	0.737801	0.401273	25
52	gi115249066	CD0062	CAJ66877.1	rplA	50S ribosomal protein L1	268	4	23	24.81	9.42	Cytoplasmic	No	No	0.16	0.44544	0.242265	25
53	gi115251566	CD2513	CAJ69399.1		putative translation inhibitor endoribonuclease	262	4	68	13.6	4.91	Cytoplasmic	No	No	0.666667	3.64159	1.98058	6
54	gi115249125	CD0116	CAJ66936.1		putative oxidoreductase, thiamine diP-binding subunit (ferredoxin/flavodoxin oxidoreductase,alpha subunit )	261	5	19	39.15	5.39	Cytoplasmic	No	No	0.263158	0.832981	0.453039	19
55	gi115250075	CD1054	CAJ67895.1	bcd2	butyryl-CoA dehydrogenase	258	5	17	41.31	5.87	Cytoplasmic	No	No	0.192308	0.557068	0.302977	26
56	gi115251191	CD2137	CAJ69022.1	frr	ribosome recycling factor	256	6	36	21.11	7.39	Cytoplasmic	No	No	0.222222	0.668101	0.363365	27
57	gi115249076	CD0072	CAJ66887.1	rpsJ	30S ribosomal protein S10	245	5	39	11.7	9.89	Unknown	No	Yes 0.562771	0.3125	1.05353	0.572988	16
58	gi115251734	CD2683	CAJ69569.1		putative propanediol utilization protein	244	5	29	20.07	6.42	Cytoplasmic	No	No	0.294118	0.968419	0.526701	17
59	gi115249997	CD0976	CAJ67817.1		hypothetical phage protein	240	4	30	16.98	5.12	Cytoplasmic	No	No	0.266667	0.84785	0.461126	15
60	gi115251501	CD2447	CAJ69334.1		histidine triad nucleotide-binding protein	237	4	46	13.06	6.63	Cytoplasmic	No	No	0.4	1.51189	0.822281	10
61	gi115252530	CD3470	CAJ70373.1	atpA	ATP synthase alpha chain	232	4	11	54.67	5	Cytoplasmic	No	No	0.133333	0.359356	0.195446	30
62	gi115249735	CD0718	CAJ67552.1	fhs	formate--tetrahydrofolate ligase (Formyltetrahydrofolate synthetase)	222	4	10	59.99	5.86	Cytoplasmic	No	No	0.097561	0.251875	0.136989	41
63	gi115252228	CD3171	CAJ70068.1	gpmI	2,3-bisphosphoglycerate-independent phosphoglycerate mutase	218	5	13	56.38	5.19	Cytoplasmic	No	No	0.833333	5.81292	3.16152	6
64	gi115250577	CD1536	CAJ68401.1		putative dehydrogenase, electron transfer subunit (Ferredoxin--NADP(+) reductase subunit alpha )	213	3	18	33.04	5.74	Cytoplasmic	No	No	0.2	0.584893	0.31811	15
65	gi115251723	CD2672	CAJ69558.1	appA	oligopeptide ABC transporter, substrate-binding protein	212	4	9	58.17	5.44	Cell wall	Yes ACA-SN 23-24	Yes 0.859971	0.117647	0.311134	0.169219	34
66	gi115251674	CD2623	CAJ69509.1		putative alanine racemase (pyridoxal 5'-phosphate-dependent)	209	4	22	26.98	6.01	Cytoplasmic	No	No	0.166667	0.467799	0.254425	24
67	gi115249068	CD0064	CAJ66879.1	rplL	50S ribosomal protein L7/L12	207	4	48	12.62	4.76	Cytoplasmic	No	No	0.266667	0.84785	0.461126	15
68	gi115251485	CD2432	CAJ69318.1	glyS	glycyl-tRNA synthetase beta chain	206	4	6	78.48	5.05	Cytoplasmic	No	No	0.0615385	0.152228	0.0827934	65
69	gi115252540	CD3480	CAJ70383.1	rpiB2	ribose-5-phosphate isomerase 2	205	5	51	16.27	6.18	Cytoplasmic	No	No	0.714286	4.17947	2.27312	7
70	gi115251669	CD2618	CAJ69504.1	ileS	isoleucyl-tRNA synthetase	192	5	6	119.72	5.19	Cytoplasmic	No	No	0.0793651	0.200508	0.109052	63
71	gi115251575	CD2521	CAJ69408.1	leuS	leucyl-tRNA synthetase	191	4	7	92.44	5.26	Cytoplasmic	No	No	0.0666667	0.165914	0.0902371	60
72	gi115251299	CD2245	CAJ69130.1	asnC	asparaginyl-tRNA synthetase	187	4	11	53.83	5.11	Cytoplasmic	No	No	0.105263	0.274275	0.149172	38
73	gi115249096	CD0089	CAJ66907.1	rplO	50S ribosomal protein L15	184	4	30	15.81	10.4	Unknown	No	No	0.173913	0.492496	0.267857	23
74	gi115251808	CD2755	CAJ69643.1	ptsI	phosphoenolpyruvate-protein phosphotransferase (PTS system, EI component )	181	4	10	63.16	4.91	Cytoplasmic	No	No	0.108108	0.28265	0.153727	37
75	gi115252230	CD3173	CAJ70070.1	pgk	phosphoglycerate kinase	180	3	11	43.07	5.18	Cytoplasmic	No	No	0.15	0.412538	0.22437	20
76	gi115249065	CD0061	CAJ66876.1	rplK	50S ribosomal protein L11	173	4	34	14.79	9.89	Unknown	No	No	0.266667	0.84785	0.461126	15
77	gi115249124	CD0115	CAJ66935.1		ferredoxin (4Fe-4S ferredoxin, iron-sulfur binding domain protein, delta subunit )	171	3	41	7.69	7.51	Unknown	No	No	0.428571	1.6827	0.91518	7
78	gi115252280	CD3223	CAJ70121.1	dapA2	dihydrodipicolinate synthase	168	3	13	31.79	5.02	Cytoplasmic	No	No	0.272727	0.873817	0.475249	11
79	gi115252479	CD3419	CAJ70322.1	hemB	delta-aminolevulinic acid dehydratase	168	4	15	36.18	5.08	Cytoplasmic	Yes LRA-SK 12-13	No	0.363636	1.31013	0.71255	11
80	gi115249400	CD0394	CAJ67216.1	ldhA	(R)-2-hydroxyisocaproate dehydrogenase	166	4	22	36.52	5.19	Cytoplasmic	No	No	0.2	0.584893	0.31811	20
81	gi115250207	CD1175	CAJ68028.1	ackA	acetate kinase	164	3	9	43.32	5.63	Cytoplasmic	No	No	0.111111	0.29155	0.158567	27
82	gi115249106	CD0098	CAJ66917.1	rpoA	DNA-directed RNA polymerase alpha chain	163	4	15	34.92	4.69	Cytoplasmic	No	No	0.166667	0.467799	0.254425	24
83	gi115249126	CD0117	CAJ66937.1		putative subunit of oxidoreductase (ferredoxin/flavodoxin oxidoreductase,beta subunit)	162	4	16	26.77	6.86	Unknown	No	No	0.444444	1.78256	0.969494	9
84	gi115251376	CD2321	CAJ69208.1	tkt	transketolase (central and C-terminal )	162	3	15	32.35	5.16	Cytoplasmic	No	No	0.2	0.584893	0.31811	15
85	gi115251586	CD2532	CAJ69419.1		putative aminotransferase (alanine--glyoxylate transaminase)	161	3	11	42.37	5.04	Cytoplasmic	No	No	0.15	0.412538	0.22437	20
86	gi115249842	CD0825	CAJ67659.1	rbr	rubrerythrin	160	3	23	20.62	5.5	Cytoplasmic	No	No	0.176471	0.501311	0.272652	17
87	gi115252312	CD3256	CAJ70153.1	valS	valyl-tRNA synthetase	160	3	5	103.01	5.27	Cytoplasmic	No	No	0.0422535	0.102183	0.0555748	71
88	gi115249094	CD0088	CAJ66905.1	rpsE	30S ribosomal protein S5	159	4	40	17.85	9.82	Cytoplasmic	No	No	0.235294	0.719072	0.391087	17
89	gi115251397	CD2342	CAJ69229.1	sucD	succinate-semialdehyde dehydrogenase [NAD(P)+]	159	3	8	50.69	5.72	Cytoplasmic	No	No	0.0857143	0.218188	0.118667	35
90	gi115252728	CD3663	CAJ70572.1	rpsF	30S ribosomal protein S6	159	3	32	10.55	7.24	Cytoplasmic	No	No	0.214286	0.637894	0.346936	14
91	gi115251040	CD1993	CAJ68871.1		putative decarboxylase	156	3	29	12.43	5.56	Unknown	No	Yes 0.517857	0.230769	0.701254	0.381396	13
92	gi115249070	CD0066	CAJ66881.1	rpoB	DNA-directed RNA polymerase beta chain	151	3	3	139.34	4.87	Cytoplasmic	No	No	0.0333333	0.0797752	0.0433879	90
93	gi115250675	CD1634	CAJ68499.1	terB	tellurium resistance protein	150	2	15	20.76	4.7	Unknown	No	Yes 0.618172	0.2	0.584893	0.31811	10
94	gi115250391	CD1355	CAJ68213.1	cspB	putative cold shock protein, CspB	148	2	39	7.12	4.77	Cytoplasmic	No	No	0.4	1.51189	0.822281	5
95	gi115249077	CD0073	CAJ66888.1	rplC	50S ribosomal protein L3	146	3	15	22.33	9.95	Cytoplasmic	No	No	0.09375	0.240938	0.131041	32
96	gi115251377	CD2322	CAJ69209.1	tkt	transketolase (N-terminal )	145	3	12	29.15	5.83	Cytoplasmic	No	No	0.230769	0.701254	0.381396	13
97	gi115250193	CD1161	CAJ68014.1	rplU	50S ribosomal protein L21	139	3	42	11.33	9.58	Unknown	No	Yes 0.551236	0.25	0.778279	0.423289	12
98	gi115249079	CD0075	CAJ66890.1	rplW	50S ribosomal protein L23	137	3	26	10.8	9.66	Cytoplasmic	No	No	0.214286	0.637894	0.346936	14
99	gi115249088	CD0083	CAJ66899.1	rplX	50S ribosomal protein L24	137	3	26	11.09	10.1	Unknown	No	Yes 0.907242	0.25	0.778279	0.423289	12
100	gi115249247	CD0239	CAJ67060.1	fliC	flagellin subunit, fliC	136	2	10	30.78	8.32	Extracellular	No	Yes 0.706823	0.0909091	0.232847	0.12664	22
101	gi115249716	CD0700	CAJ67533.1	pheT	phenylalanyl-tRNA synthetase beta chain	136	3	5	89.24	4.99	Cytoplasmic	No	No	0.047619	0.115884	0.0630267	63
102	gi115249067	CD0063	CAJ66878.1	rplJ	50S ribosomal protein L10	135	3	20	18.6	6.24	Unknown	No	No	0.157895	0.43845	0.238463	19
103	gi115250352	CD1316	CAJ68174.1	rpsO	30S ribosomal protein S15	135	3	39	9.73	10.1	Cytoplasmic	No	No	0.214286	0.637894	0.346936	14
104	gi115250676	CD1635	CAJ68500.1	terD	tellurium resistance protein	133	2	13	21.53	4.66	Cytoplasmic	No	No	0.2	0.584893	0.31811	10
105	gi115249112	CD0104	CAJ66923.1	rplM	50S ribosomal protein L13	132	3	25	16.2	9.81	Unknown	No	No	0.25	0.778279	0.423289	12
106	gi115251756	CD2705	CAJ69591.1		putative amidohydrolas	129	3	10	50.68	5.74	Cytoplasmic	No	No	0.0789474	0.199354	0.108424	38
107	gi115249093	CD0087	CAJ66904.1	rplR	50S ribosomal protein L18	127	3	27	13.58	10.2	Cytoplasmic	No	No	0.230769	0.701254	0.381396	13
108	gi115250664	CD1623	CAJ68488.1		putative nitric oxide reductase flavoprotein	127	3	4	94.31	5.07	Cytoplasmic	No	No	0.0576923	0.142069	0.0772681	52
109	gi115249082	CD0078	CAJ66893.1	rplV	50S ribosomal protein L22	125	3	19	12.25	10.3	Cytoplasmic	No	No	0.166667	0.467799	0.254425	18
110	gi115249807	CD0790	CAJ67624.1		putative NUDIX-family hydrolase	125	2	16	16.55	6.55	Unknown	No	No	0.153846	0.425103	0.231204	13
111	gi115252075	CD3018	CAJ69912.1		conserved hypothetical protein (redox-active protein)	125	3	17	17.39	6.89	Cytoplasmic	No	No	0.176471	0.501311	0.272652	17
112	gi115249061	CD0058	CAJ66872.1	tuf1	elongation factor TU	122	3	10	44.03	5.04	Cytoplasmic	No	No	0.136364	0.368875	0.200622	22
113	gi115249589	CD0574	CAJ67406.1	thrS	threonyl-tRNA synthetase	117	2	5	73.55	5.44	Cytoplasmic	No	No	0.0338983	0.0811808	0.0441524	59
114	gi115251664	CD2613	CAJ69499.1		probable peptidase (peptidase, M24 family)	117	2	6	39.83	4.92	Cytoplasmic	No	No	0.0909091	0.232847	0.12664	22
115	gi115252633	CD3570	CAJ70476.1		probable dipeptidase (M19 family)	115	2	8	35.5	5.69	Cytoplasmic	No	No	0.0714286	0.178769	0.0972282	28
116	gi115249104	CD0096	CAJ66915.1	rpsK	30S ribosomal protein S11	112	2	10	14.44	11.3	Cytoplasmic	No	No	0.285714	0.930698	0.506185	7
117	gi115249206	CD0198	CAJ67019.1	guaA	GMP synthase [glutamine-hydrolyzing] (Glutamine amidotransferase)	112	2	7	57.33	5.37	Cytoplasmic	No	No	0.0625	0.154782	0.0841824	32
118	gi115252547	CD3486A	CAJ70390.1	rpmE	50S ribosomal protein L31	112	2	30	7.63	8.97	Extracellular	No	Yes 0.886011	0.333333	1.15443	0.627871	6
119	gi115249398	CD0392	CAJ67213.1		Radical SAM-superfamily protein	111	2	14	22.72	5.37	Cytoplasmic	No	No	0.181818	0.519911	0.282768	11
120	gi115250845	CD1799	CAJ68669.1	terD	tellurium resistance protein	111	1	9	21.17	4.75	Unknown	No	No	0.0909091	0.232847	0.12664	11
121	gi115249085	CD0080A	CAJ66896.1	rpmC	50S ribosomal protein L29	106	2	29	7.85	9.76	Cytoplasmic	No	No	0.25	0.778279	0.423289	8
122	gi115250291	CD1257	CAJ68113.1	rplS	50S ribosomal protein L19	103	3	26	13.3	10.8	Unknown	No	No	0.142857	0.389495	0.211838	21
123	gi115249089	CD0084	CAJ66900.1	rplE	50S ribosomal protein L5	101	2	14	20.44	9.48	Cytoplasmic	No	No	0.0769231	0.193777	0.105391	26
124	gi115251074	CD2020	CAJ68905.1	clpB	chaperone, ClpB,(C-terminal, D2-small domain)	101	3	4	97.68	5.47	Cytoplasmic	No	No	0.0365854	0.087891	0.0478019	82
125	gi115249083	CD0079	CAJ66894.1	rpsC	30S ribosomal protein S3	99	2	11	30.37	10.3	Cytoplasmic	No	No	0.0666667	0.165914	0.0902371	30
126	gi115249017	CD0014	CAJ66828.1	serS1	seryl-tRNA synthetase 1	97	3	9	48.53	5.94	Cytoplasmic	No	No	0.0810811	0.205261	0.111637	37
127	gi115249180	CD0171	CAJ66992.1	rex	putative DNA-binding protein (Transcriptional regulator, Redox-sensing repressor Rex)	96	2	8	23.31	8.07	Cytoplasmic	No	No	0.166667	0.467799	0.254425	12
128	gi115249727	CD0711	CAJ67544.1	argS	arginyl-tRNA synthetase	95	2	5	65	5.53	Cytoplasmic	No	No	0.0392157	0.0944998	0.0513963	51
129	gi115251248	CD2195	CAJ69079.1	ftnA	ferritin	93	1	10	19.56	4.8	Cytoplasmic	No	No	0.2	0.584893	0.31811	5
130	gi115249009	CD0006	CAJ66820.1	gyrA	DNA gyrase subunit A	92	2	2	91.11	6.89	Cytoplasmic	No	No	0.0227273	0.053725	0.0292198	88
131	gi115251487	CD2434	CAJ69320.1		conserved hypothetical protein (DUF4342)	92	2	9	22.23	4.88	Cytoplasmic	No	No	0.0769231	0.193777	0.105391	26
132	gi115249853	CD0836	CAJ67670.1		putative acetyltransferase	89	2	11	19.07	5.7	Cytoplasmic	No	No	0.0869565	0.221677	0.120565	23
133	gi115250297	CD1263	CAJ68119.1		putative FMN-dependent dehydrogenase	88	2	7	35.53	6.76	Cytoplasmic	No	No	0.105263	0.274275	0.149172	19
134	gi115251809	CD2756	CAJ69644.1	ptsH	PTS system, phosphocarrier protein (HPr protein )	88	2	28	9.07	5.13	Cytoplasmic	No	No	0.333333	1.15443	0.627871	6
135	gi115251820	CD2767	CAJ69655.1		cell surface protein	85	2	4	77.84	8.57	Cell wall	Yes SFA-DS 24-25	Yes 0.867233	0.0434783	0.105295	0.0572676	46
136	gi115252575	CD3514	CAJ70418.1	prs	ribose-phosphate pyrophosphokinase	85	2	10	34.23	5.6	Cytoplasmic	No	No	0.2	0.584893	0.31811	10
137	gi115249184	CD0174	CAJ66996.1	cooS	putative oxidoreductase, acetyl-CoA synthase subunit	84	1	3	68.15	5.59	Cytoplasmic	No	No	0.0204082	0.0481131	0.0261676	49
138	gi115252096	CD3041	CAJ69934.1	pepI	proline iminopeptidase (peptidase S33 family )	84	1	5	33.67	5.27	Cytoplasmic	No	No	0.0714286	0.178769	0.0972282	14
139	gi115250078	CD1057	CAJ67898.1	crt2	3-hydroxybutyryl-CoA dehydratase (crotonase)	83	2	8	28.44	5.05	Cytoplasmic	No	No	0.166667	0.467799	0.254425	12
140	gi115249020	CD0017	CAJ66831.1		conserved hypothetical protein (YbaB/EbfC DNA-binding family)	81	2	22	12.38	5	Unknown	No	No	0.333333	1.15443	0.627871	6
141	gi115249115	CD0107	CAJ66926.1	aspC	aspartate aminotransferase	81	1	4	44.11	5.36	Cytoplasmic Membrane	No	Yes 0.629863	0.0384615	0.0926009	0.0503635	26
142	gi115252616	CD3553	CAJ70459.1	greA	transcription elongation factor	81	2	17	18.02	4.64	Cytoplasmic	No	No	0.111111	0.29155	0.158567	18
143	gi115252635	CD3571	CAJ70478.1		putative preprotein translocase	80	2	16	19.13	5.03	Cytoplasmic	No	No	0.153846	0.425103	0.231204	13
144	gi115249811	CD0794	CAJ67628.1	nadE	NH3-dependent NAD(+) synthetase	79	1	6	28.02	5.07	Cytoplasmic	No	No	0.047619	0.115884	0.0630267	21
145	gi115252294	CD3237	CAJ70135.1	prdF	putative proline racemase	77	1	4	36.22	5.42	Cytoplasmic	No	No	0.047619	0.115884	0.0630267	21
146	gi115250155	CD1125	CAJ67976.1		nitroreductase-family protein	76	2	6	32.73	5.37	Cytoplasmic	No	No	0.0714286	0.178769	0.0972282	28
147	gi115251455	CD2403	CAJ69288.1	dut	deoxyuridine 5'-triphosphate nucleotidohydrolase (dUTPase)	76	2	21	15.82	6.94	Cytoplasmic	No	No	0.2	0.584893	0.31811	10
148	gi115252223	CD3167	CAJ70063.1		putative phosphatidylethanolamine-binding regulatory protein	76	1	8	18.33	5.06	Unknown	No	No	0.25	0.778279	0.423289	4
149	gi115250371	CD1335	CAJ68193.1		MarR-family transcriptional regulator	75	2	13	17.58	8.45	Cytoplasmic	No	Yes 0.505274	0.111111	0.29155	0.158567	18
150	gi115251192	CD2138	CAJ69023.1	pyrH	uridylate kinase (Uridine monophosphate kinase) (UMP kinase)	75	2	8	25.83	6.12	Cytoplasmic	No	No	0.111111	0.29155	0.158567	18
151	gi115249107	CD0099	CAJ66918.1	rplQ	50S ribosomal protein L17	74	2	13	12.97	10.4	Cytoplasmic	No	No	0.105263	0.274275	0.149172	19
152	gi115251648	CD2591	CAJ69481.1	ltaE	low-specificity L-threonine aldolase	74	1	5	37.9	5.63	Cytoplasmic	No	No	0.037037	0.089023	0.0484176	27
153	gi115249887	CD0873	CAJ67706.1		ABC transporter, substrate-binding lipoprotein (sugar-family extracellular solute-binding protein )	73	1	6	36.07	5.5	Unknown	Yes SQG-GD 27-28	Yes 0.773062	0.0588235	0.145048	0.0788881	17
154	gi115250635	CD1594	CAJ68459.1	cysK	putative O-acetylserine sulfhydrylase	72	2	7	32.67	5.46	Unknown	No	No	0.0952381	0.245197	0.133357	21
155	gi115250736	CD1693	CAJ68560.1		putative dinitrogenase iron-molybdenum cofactor	70	2	18	12.92	5.93	Cytoplasmic	No	No	0.5	2.16228	1.17601	4
156	gi115251246	CD2193	CAJ69077.1		cell surface protein	70	1	3	51.32	7.26	Cellwall	Yes VDA-LT 26-27	Yes 0.894801	0.0285714	0.0680004	0.0369839	35
157	gi115252071	CD3014	CAJ69908.1		PTS system, IIb component (mannose-specfic IIB component )	70	1	15	11.49	8.99	Extracellular	No	No	0.125	0.333521	0.181395	8
158	gi115252670	CD3605A	CAJ70513.1		ferredoxin	70	1	22	6.43	4.26	Unknown	No	No	1	9	4.8949	1
159	gi115250287	CD1253	CAJ68109.1	rpsP	30S ribosomal protein S16	69	1	16	10.25	10	Cytoplasmic	No	Yes 0.611549	0.0714286	0.178769	0.0972282	14
160	gi115252298	CD3241	CAJ70139.1	prdB	proline reductase	69	1	8	25.58	6.08	Cytoplasmic	No	No	0.142857	0.389495	0.211838	7
161	gi115251678	CD2627	CAJ69513.1		conserved hypothetical protein (ACT domain)	68	1	12	10.19	5.48	Cytoplasmic	No	No	0.1	0.258925	0.140824	10
162	gi115251527	CD2473	CAJ69360.1	rpsT	30S ribosomal protein S20	67	2	18	9.78	11.1	Unknown	No	No	0.0952381	0.245197	0.133357	21
163	gi115249071	CD0067	CAJ66882.1	rpoC	DNA-directed RNA polymerase beta' chain	66	2	2	129.75	7.95	Cytoplasmic	No	No	0.0183486	0.0431545	0.0234707	109
164	gi115249078	CD0074	CAJ66889.1	rplD	50S ribosomal protein L4	66	1	6	23.77	9.96	Unknown	No	Yes 0.634191	0.04	0.0964782	0.0524723	25
165	gi115249081	CD0077	CAJ66892.1	rpsS	30S ribosomal protein S19	65	2	35	10.61	10.1	Unknown	Yes AMN-AS 23-24	Yes 0.762249	0.166667	0.467799	0.254425	12
166	gi115249824	CD0807	CAJ67641.1		hypothetical protein	65	1	12	13.77	4.95	Cytoplasmic	No	No	0.0833333	0.211528	0.115045	12
167	gi115252719	CD3655	CAJ70563.1	purA	adenylosuccinate synthetase (IMP--aspartate ligase)	65	2	7	47.27	5.42	Cytoplasmic	No	No	0.0714286	0.178769	0.0972282	28
168	gi115251396	CD2341	CAJ69228.1	abfD	gamma-aminobutyrate metabolism dehydratase/isomerase	63	1	3	55.11	6.19	Cytoplasmic	No	No	0.04	0.0964782	0.0524723	25
169	gi115249092	CD0086	CAJ66903.1	rplF	50S ribosomal protein L6	62	2	12	19.97	9.85	Cytoplasmic	No	No	0.111111	0.29155	0.158567	18
170	gi115249844	CD0827	CAJ67661.1	rbo	rubredoxin oxidoreductase (desulfoferrodoxin)	62	1	10	14.06	6.04	Unknown	No	No	0.166667	0.467799	0.254425	6
171	gi115249013	CD0010	CAJ66824.1	rbsW	anti-sigma-B factor (serine-protein kinase)	61	1	12	14.86	4.59	Cytoplasmic	No	No	0.142857	0.389495	0.211838	7
172	gi115249861	CD0844	CAJ67678.1		cell surface protein	60	1	4	33.8	5.37	Cell wall	Yes INA-LD 27-28	No	0.0322581	0.0771051	0.0419357	31
173	gi115250542	CD1502	CAJ68366.1	deoC	putative deoxyribose-phosphate aldolase (Phosphodeoxyriboaldolase)	60	1	7	24	5.77	Cytoplasmic	No	No	0.0434783	0.105295	0.0572676	23
174	gi115251631	CD2575	CAJ69464.1	rpe	ribulose-phosphate 3-epimerase (Pentose-5-phosphate 3-epimerase)	59	1	7	24.2	5.17	Cytoplasmic	No	No	0.142857	0.389495	0.211838	7
175	gi115251194	CD2140	CAJ69025.1	rpsB	30S ribosomal protein S2	58	1	5	26.85	6.58	Cytoplasmic	No	No	0.047619	0.115884	0.0630267	21
176	gi115251486	CD2433	CAJ69319	glyQ	glycyl-tRNA synthetase alpha chain	58	1	5	33.86	4.71	Cytoplasmic	No	No	0.0666667	0.165914	0.0902371	15
177	gi115251837	CD2784	CAJ69672.1		cell surface protein (putative N-acetylmuramoyl-L-alanine amidase,autolysin )	58	1	2	73.05	7.17	Cell wall	Yes ALA-AE 26-27	Yes 0.857591	0.0178571	0.0419746	0.022829	56
178	gi115252283	CD3226	CAJ70124.1	dapB1	dihydrodipicolinate reductase 1 (DHPR 1)	58	1	5	27.29	5.83	Cytoplasmic	No	No	0.0833333	0.211528	0.115045	12
179	gi115251313	CD2259	CAJ69144.1		conserved hypothetical protein (RmlC-like jelly roll fold )	57	1	11	12.9	5.16	Cytoplasmic	No	No	0.2	0.584893	0.31811	5
180	gi115252284	CD3227	CAJ70125.1	dapH	2,3,4,5-tetrahydropyridine-2,6-dicarboxylate N-succinyltransferase	56	1	5	25.33	5.67	Cytoplasmic	No	No	0.0833333	0.211528	0.115045	12
181	gi115252362	CD3306	CAJ70203.1	tig	trigger factor	56	1	4	48.19	4.62	Cytoplasmic	No	No	0.0243902	0.0577676	0.0314185	41
182	gi115251108	CD2054	CAJ68939.1	lysC	aspartokinase	55	1	4	43.22	5.08	Cytoplasmic	No	No	0.03125	0.0746078	0.0405775	32
183	gi115249829	CD0812	CAJ67646.1		putative universal stress protein	54	1	7	15.35	7.33	Cytoplasmic	No	No	0.0909091	0.232847	0.12664	11
184	gi115250279	CD1246	CAJ68101.1	efp	elongation factor P	54	1	4	20.89	5.06	Cytoplasmic	No	No	0.0416667	0.100694	0.0547653	24
185	gi115251567	CD2514	CAJ69400.1	tdcB	threonine dehydratase catabolic	54	1	5	42.99	5.43	Cytoplasmic	No	No	0.0416667	0.100694	0.0547653	24
186	gi115249137	CD0128	CAJ66948.1	fabZ	(3R)-hydroxymyristoyl-[acyl carrier protein] dehydratase	53	1	6	15.86	7.28	Cytoplasmic	No	No	0.0769231	0.193777	0.105391	13
187	gi115252652	CD3588	CAJ70495.1	carB1	carbamoyl-phosphate synthase,pyrimidine-specific, large chain	53	2	2	119.21	5.18	Cytoplasmic	No	No	0.0238095	0.0563541	0.0306497	84
188	gi115250846	CD1800	CAJ68670.1	terD	tellurium resistance protein	52	1	7	21.43	7.48	Cytoplasmic	No	Yes 0.524407	0.0625	0.154782	0.0841824	16
189	gi115249121	CD0112	CAJ66932.1	ptb	phosphate butyryltransferase	51	1	6	32.41	5.81	Cytoplasmic	No	No	0.0322581	0.0771051	0.0419357	31
190	gi115249080	CD0076	CAJ66891.1	rplB	50S ribosomal protein L2	50	1	4	29.89	10.6	Unknown	No	No	0.0384615	0.0926009	0.0503635	26
191	gi115249688	CD0672	CAJ67505.1		conserved hypothetical protein	50	1	5	29.76	5.52	Cytoplasmic	No	No	0.0666667	0.165914	0.0902371	15
192	gi115250989	CD1943	CAJ68818.1		conserved hypothetical protein	50	1	11	11.48	4.5	Unknown	No	Yes 0.717428	0.25	0.778279	0.423289	4
193	gi115251548	CD2495	CAJ69381.1	fdhA/selA	L-seryl-tRNA(Sec) selenium transferase (selenocysteinyl-tRNA(Sec) synthase)	50	1	2	52.41	5.46	Cytoplasmic	No	No	0.025641	0.0608184	0.0330777	39
194	gi115251628	CD2572	CAJ69461.1		putative nitroreductase	49	1	5	24.76	6.27	Cytoplasmic	No	No	0.0588235	0.145048	0.0788881	17
195	gi115252732	CD3667	CAJ70576.1		conserved hypothetical protein SirA family, only in Firmicutes	49	1	7	22.17	4.94	Unknown	No	No	0.0769231	0.193777	0.105391	13
196	gi115249008	CD0005	CAJ66819.1	gyrB	DNA gyrase subunit B	48	1	2	71.13	6.04	Cytoplasmic	No	No	0.0185185	0.0435626	0.0236927	54
197	gi115250238	CD1205	CAJ68059.1	ispA	geranyltranstransferase	46	1	6	32.69	5.17	Cytoplasmic	No	No	0.04	0.0964782	0.0524723	25
198	gi115249122	CD0113	CAJ66933.1	buk	butyrate kinase (Branched-chain carboxylic acid kinase)	45	1	3	38.7	5.45	Cytoplasmic	No	No	0.0357143	0.0857111	0.0466163	28
199	gi115249195	CD0185	CAJ67007.1	pyrK	dihydroorotate dehydrogenase electron transfer subunit	45	1	8	25.63	5.73	Cytoplasmic	No	No	0.0769231	0.193777	0.105391	13
200	gi115251797	CD2745	CAJ69632.1	apt	adenine phosphoribosyltransferase (APRT)	45	1	13	18.77	4.98	Cytoplasmic	No	No	0.142857	0.389495	0.211838	7
201	gi115252458	CD3398	CAJ70301.1		putative DNA repair protein (nucleotide pyrophosphatase) (putative hydrolase, NUDIX family)	45	1	10	16.43	5.97	Cytoplasmic	No	No	0.0588235	0.145048	0.0788881	17
202	gi115251448	CD2396	CAJ69281.1		conserved hypothetical protein	43	1	7	19.59	5.15	Unknown	No	No	0.142857	0.389495	0.211838	7
203	gi115249703	CD0687	CAJ67520.1	rplT	50S ribosomal protein L20	42	1	13	13.47	11.4	Unknown	Yes RPA-NT 35-36	No	0.0555556	0.136464	0.0742195	18
						49786	921	3876
						245.251	4.53695	19.0936
