# Supplementary material for: Semiquantitative Analysis of Clinical Heat Stress in Clostridium difficile Strain 630 Using a GeLC/MS Workflow with emPAI Quantitation
Source: PLoS One. 2014 Feb 24;9(2):e88960. doi: 10.1371/journal.pone.0088960 (PMC3933415; doi:10.1371/journal.pone.0088960)
Supplement: Table S4 — Combined final emPAI master list 41°C v 37°C xls file. (XLS) [file pone.0088960.s009.xls]

## Sheet: combined
No. 37	Acc No.	Locus	Genbank	Gene	Protein name	Protein name	Functional Category (Subtilist)	Mol Wt. (kD)	pI	PSORTb	SignalP	SecretomeP	MOWSE 37	No. Pep 37	Coverage 37	PAI 37	emPAI 37	Molar% 37	N (obs)	No. 41	MOWSE 41	No. Pep 41	Coverage 41	PAI 41	emPAI 41	Molar% 41	N (obs)	Fold Change (Ratio M% 41/37)	Locus	Protein Name	Functional Category (Subtilist)	log 2 ratio	abs fold change		Microarray	array p val	fold ch	direction	log value	Locus
126	gi115251837	CD2784	CAJ69672.1	cwp6	cell surface protein (putative N-acetylmuramoyl-L-alanine amidase,autolysin)	cell surface protein (putative N-acetylmuramoyl-L-alanine amidase,autolysin)	1.1 Cell wall	73.05	7.17	Cell wall	Yes ALA-AE 26-27	Yes 0.857591	150	3	6	0.0535714	0.131283	0.0512954	56	177	58	1	2	0.0178571	0.0419746	0.022829	56	0.44505	CD2784	cell surface protein (putative N-acetylmuramoyl-L-alanine amidase,autolysin)	1.1 Cell wall	-1.16796	2.24694	↓↓		0.293542	1.32604	Up	0.407121	CD2784
24	gi115251846	CD2793	CAJ69681.1	slpA	cell surface protein (S-layer precursor protein)	cell surface protein (S-layer precursor protein)	1.1 Cell wall	76.14	4.95	Cell wall	Yes VFA-AT 24-25	Yes 0.863011	645	9	22	0.160714	0.447819	0.174973	56	29	534	9	17	0.160714	0.447819	0.243559	56	1.39198	CD2793	cell surface protein (S-layer precursor protein)	1.1 Cell wall	0.477136	1.39198	↑		0.486661	1.28552	Down	-0.362356	CD2793
107	gi115251246	CD2193	CAJ69077.1	cwp24	cell surface protein	cell surface protein	1.1 Cell wall	51.32	7.26	Cell wall	Yes VDA-LT 26-27	Yes 0.894801	173	3	11	0.0857143	0.218188	0.085251	35	156	70	1	3	0.0285714	0.0680004	0.0369839	35	0.433824	CD2193	cell surface protein	1.1 Cell wall	-1.20482	2.30508	↓↓		0.850809	1.04344	Down	-0.0613434	CD2193
57	gi115251723	CD2672	CAJ69558.1	appA	oligopeptide ABC transporter, substrate-binding protein	oligopeptide ABC transporter, substrate-binding protein	1.2 Transport binding proteins and lipoproteins	58.17	5.44	Cell wall	Yes ACA-SN 23-24	Yes 0.859971	355	7	16	0.205882	0.606506	0.236976	34	65	212	4	9	0.117647	0.311134	0.169219	34	0.714076	CD2672	oligopeptide ABC transporter, substrate-binding protein	1.2 Transport binding proteins and lipoproteins	-0.48585	1.40041	↓		0.380266	1.06034	Up	0.084528	CD2672
16	gi115251808	CD2755	CAJ69643.1		phosphoenolpyruvate-protein phosphotransferase (PTS system, EI component )	phosphoenolpyruvate-protein phosphotransferase (PTS system, EI component )	1.2 Transport/binding proteins and lipoproteins	63.16	4.91	Cytoplasmic	No	No	826	15	28	0.405405	1.54335	0.60302	37	74	181	4	10	0.108108	0.28265	0.153727	37	0.254928	CD2755	phosphoenolpyruvate-protein phosphotransferase (PTS system, EI component )	1.2 Transport/binding proteins and lipoproteins	-1.97184	3.92267	↓↓		0.0258182	1.46496	Down	-0.550861	CD2755
189	gi115252071	CD3014	CAJ69908.1		PTS system, mannose-specfic IIB component	PTS system, mannose-specfic IIB component	1.2 Transport/binding proteins and lipoproteins	11.49	8.99	Extracellular	No	No	62	1	15	0.125	0.333521	0.130314	8	157	70	1	15	0.125	0.333521	0.181395	8	1.39198	CD3014	PTS system, mannose-specfic IIB component	1.2 Transport/binding proteins and lipoproteins	0.477136	1.39198	↑		0.0606444	1.67091	Down	-0.740633	CD3014
96	gi115251809	CD2756	CAJ69644.1	ptsH	PTS system, phosphocarrier (Hpr) protein	PTS system, phosphocarrier (Hpr) protein	1.2 Transport/binding proteins and lipoproteins	9.07	5.13	Cytoplasmic	No	No	208	3	28	0.5	2.16228	0.844851	6	134	88	2	28	0.333333	1.15443	0.627871	6	0.743174	CD2756	PTS system, phosphocarrier (Hpr) protein	1.2 Transport/binding proteins and lipoproteins	-0.428229	1.34558	↓		0.618327	1.21356	Up	0.279249	CD2756
198	gi115249887	CD0873	CAJ67706.1		ABC transporter, substrate-binding lipoprotein	ABC transporter, substrate-binding lipoprotein	1.2 Transport/binding proteins/lipoproteins	36.07	5.5	Unknown	Yes SQG-GD 27-28	Yes 0.773062	57	1	6	0.0588235	0.145048	0.0566734	17	153	73	1	6	0.0588235	0.145048	0.0788881	17	1.39198	CD0873	ABC transporter, substrate-binding lipoprotein	1.2 Transport/binding proteins/lipoproteins	0.477136	1.39198	↑		0.534659	1.69153	Down	-0.758331	CD0873
186	gi115250155	CD1125	CAJ67976.1		nitroreductase-family protein	nitroreductase-family protein	1.4 Membrane bioenergetics (electron transport chain and ATP synthase)	32.73	5.37	Cytoplasmic	No	No	63	2	8	0.0714286	0.178769	0.069849	28	146	76	2	6	0.0714286	0.178769	0.0972282	28	1.39198	CD1125	nitroreductase-family protein	1.4 Membrane bioenergetics (electron transport chain and ATP synthase)	0.477136	1.39198	↑		0.0632933	2.11164	Down	-1.07837	CD1125
1	gi115251733	CD2682	CAJ69568.1		pyruvate-flavodoxin oxidoreductase	pyruvate-flavodoxin oxidoreductase	1.4 Membrane bioenergetics (electron transport chain and ATP synthase)	128.9	5.58	Cytoplasmic	No	No	2608	45	41	0.703125	4.04807	1.58167	64	1	2383	41	37	0.640625	3.37144	1.83365	64	1.15931	CD2682	pyruvate-flavodoxin oxidoreductase	1.4 Membrane bioenergetics (electron transport chain and ATP synthase)	0.21327	1.15931	↑		0.165706	1.36551	Up	0.449437	CD2682
92	gi115252530	CD3470	CAJ70373.1	atpA	ATP synthase alpha chain (F1 sector subunit)	ATP synthase alpha chain (F1 sector subunit)	1.4 Membrane bioenergetics (electron transport chain and ATP synthase)	54.67	5	Cytoplasmic	No	No	220	4	10	0.133333	0.359356	0.140409	30	61	232	4	11	0.133333	0.359356	0.195446	30	1.39198	CD3470	ATP synthase alpha chain (F1 sector subunit)	1.4 Membrane bioenergetics (electron transport chain and ATP synthase)	0.477136	1.39198	↑		0.177281	1.36226	Down	-0.446006	CD3470
127	gi115250664	CD1623	CAJ68488.1		putative nitric oxide reductase flavoprotein	putative nitric oxide reductase flavoprotein	1.4 Membrane bioenergetics (electron transport chain and ATP synthase)	94.31	5.07	Cytoplasmic	No	No	149	4	6	0.0769231	0.193777	0.0757129	52	108	127	3	4	0.0576923	0.142069	0.0772681	52	1.02054	CD1623	putative nitric oxide reductase flavoprotein	1.4 Membrane bioenergetics (electron transport chain and ATP synthase)	0.0293324	1.02054	↑		0.206871	1.28562	Down	-0.362466	CD1623
211	gi115251628	CD2572	CAJ69461.1		putative nitroreductase	putative nitroreductase	1.4 Membrane bioenergetics (electron transport chain and ATP synthase)	24.76	6.27	Cytoplasmic	No	No	53	1	5	0.0588235	0.145048	0.0566734	17	194	49	1	5	0.0588235	0.145048	0.0788881	17	1.39198	CD2572	putative nitroreductase	1.4 Membrane bioenergetics (electron transport chain and ATP synthase)	0.477136	1.39198	↑		0.238342	1.46951	Up	0.555337	CD2572
163	gi115252670	CD3605A	CAJ70513.1		ferredoxin	ferredoxin	1.4 Membrane bioenergetics (electron transport chain and ATP synthase)	6.43	4.26	Unknown	No	No	91	1	22	1	9	3.5165	1	158	70	1	22	1	9	4.8949	1	1.39198	CD3605A	ferredoxin	1.4 Membrane bioenergetics (electron transport chain and ATP synthase)	0.477136	1.39198	↑		0.367062	1.40791	Down	-0.493553	CD3605A
21	gi115250515	CD1474	CAJ68339.1		putative ruberythrin	putative ruberythrin	1.4 Membrane bioenergetics (electron transport chain and ATP synthase)	20.01	5.49	Cytoplasmic	No	No	697	10	58	0.625	3.21697	1.25694	16	18	688	10	56	0.625	3.21697	1.74963	16	1.39198	CD1474	putative ruberythrin	1.4 Membrane bioenergetics (electron transport chain and ATP synthase)	0.477136	1.39198	↑		0.407102	1.30158	Down	-0.38026	CD1474
17	gi115250565	CD1524	CAJ68389.1		putative rubrerythrin	putative rubrerythrin	1.4 Membrane bioenergetics (electron transport chain and ATP synthase)	19.99	5.63	Cytoplasmic	No	No	820	12	64	0.923077	7.37678	2.88227	13	15	778	12	61	0.923077	7.37678	4.01206	13	1.39198	CD1524	putative rubrerythrin	1.4 Membrane bioenergetics (electron transport chain and ATP synthase)	0.477136	1.39198	↑		0.508448	1.23031	Down	-0.299016	CD1524
134	gi115251248	CD2195	CAJ69079.1	ftnA	ferritin (ferroxidase diiron center [ion binding])	ferritin (ferroxidase diiron center [ion binding])	1.4 Membrane bioenergetics (electron transport chain and ATP synthase)	19.56	4.8	Cytoplasmic	No	No	135	2	21	0.4	1.51189	0.590728	5	129	93	1	10	0.2	0.584893	0.31811	5	0.538505	CD2195	ferritin (ferroxidase diiron center [ion binding])	1.4 Membrane bioenergetics (electron transport chain and ATP synthase)	-0.892968	1.85699	↓↓		0.704211	1.13949	Up	0.188388	CD2195
20	gi115249407	CD0401	CAJ67222.1		electron transfer flavoprotein alpha-subunit	electron transfer flavoprotein alpha-subunit	1.4 Membrane bioenergetics (electron transport chain and ATP synthase)	37.15	5.2	Cytoplasmic	No	No	750	15	48	0.681818	3.80638	1.48724	22	16	714	14	44	0.636364	3.32876	1.81044	22	1.21731	CD0401	electron transfer flavoprotein alpha-subunit	1.4 Membrane bioenergetics (electron transport chain and ATP synthase)	0.283702	1.21731	↑		0.841642	1.06815	Up	0.0951103	CD0401
110	gi115249842	CD0825	CAJ67659.1	rbr	rubrerythrin	rubrerythrin	1.4 Membrane bioenergetics (electron transport chain and ATP synthase)	20.62	5.5	Cytoplasmic	No	No	167	3	18	0.176471	0.501311	0.195873	17	86	160	3	23	0.176471	0.501311	0.272652	17	1.39198	CD0825	rubrerythrin	1.4 Membrane bioenergetics (electron transport chain and ATP synthase)	0.477136	1.39198	↑		0.881293	1.06759	Down	-0.0943513	CD0825
58	gi115249400	CD0394	CAJ67215.1	ldhA	(R)-2-hydroxyisocaproate dehydrogenase	(R)-2-hydroxyisocaproate dehydrogenase	1.4 Membrane bioenergetics (electron transport chain and ATP synthase)	36.52	5.19	Cytoplasmic	No	No	352	6	34	0.3	0.995262	0.388872	20	80	166	4	22	0.2	0.584893	0.31811	20	0.818034	CD0394	(R)-2-hydroxyisocaproate dehydrogenase	1.4 Membrane bioenergetics (electron transport chain and ATP synthase)	-0.289767	1.22244	↓		0.894422	1.04004	Down	-0.0566425	CD0394
28	gi115249406	CD0400	CAJ67221.1		electron transfer flavoprotein beta-subunit	electron transfer flavoprotein beta-subunit	1.4 Membrane bioenergetics (electron transport chain and ATP synthase)	28.68	5.03	Cytoplasmic	No	No	590	8	43	0.307692	1.03092	0.402803	26	30	521	8	43	0.307692	1.03092	0.560693	26	1.39198	CD0400	electron transfer flavoprotein beta-subunit	1.4 Membrane bioenergetics (electron transport chain and ATP synthase)	0.477136	1.39198	↑		0.897935	1.05485	Up	0.0770365	CD0400
194	gi115249844	CD0827	CAJ67661.1	rbo	rubredoxin oxidoreductase (desulfoferrodoxin)	rubredoxin oxidoreductase (desulfoferrodoxin)	1.4 Membrane bioenergetics (electron transport chain and ATP synthase)	14.06	6.04	Unknown	No	No	58	1	10	0.166667	0.467799	0.18278	6	170	62	1	10	0.166667	0.467799	0.254425	6	1.39198	CD0827	rubredoxin oxidoreductase (desulfoferrodoxin)	1.4 Membrane bioenergetics (electron transport chain and ATP synthase)	0.477136	1.39198	↑		0.92039	1.03652	Up	0.051741	CD0827
44	gi115249247	CD0239	CAJ67060.1	fliC	flagellin subunit	flagellin subunit	1.5 Mobility and chemotaxis	30.78	8.32	Extracellular	No	Yes 0.706823	431	6	30	0.272727	0.873817	0.34142	22	100	136	2	10	0.0909091	0.232847	0.12664	22	0.370921	CD0239	flagellin subunit	1.5 Mobility and chemotaxis	-1.43081	2.69599	↓↓		0.0109169	3.99822	Down	-1.99936	CD0239
125	gi115252635	CD3571	CAJ70478.1		putative preprotein translocase	putative preprotein translocase	1.6 Protein secretion	19.13	5.03	Cytoplasmic	No	No	152	3	20	0.230769	0.701254	0.273996	13	143	80	2	16	0.153846	0.425103	0.231204	13	0.843822	CD3571	putative preprotein translocase	1.6 Protein secretion	-0.24499	1.18508	↓		0.899723	1.07515	Down	-0.104532	CD3571
136	gi115251631	CD2575	CAJ69464.1	rpe	ribulose-phosphate 3-epimerase (Pentose-5-phosphate 3-epimerase)	ribulose-phosphate 3-epimerase (Pentose-5-phosphate 3-epimerase)	2.1.1 Specific pathways	24.2	5.17	Cytoplasmic	No	No	135	2	12	0.285714	0.930698	0.363645	7	174	59	1	7	0.142857	0.389495	0.211838	7	0.58254	CD2575	ribulose-phosphate 3-epimerase (Pentose-5-phosphate 3-epimerase)	2.1.1 Specific pathways	-0.77957	1.71662	↓↓		0.054922	1.51188	Up	0.596348	CD2575
99	gi115249807	CD0790	CAJ67624.1		putative NUDIX-family hydrolase	putative NUDIX-family hydrolase	2.1.1 Specific pathways	16.55	6.55	Unknown	No	No	193	4	31	0.307692	1.03092	0.402803	13	110	125	2	16	0.153846	0.425103	0.231204	13	0.573987	CD0790	putative NUDIX-family hydrolase	2.1.1 Specific pathways	-0.80091	1.7422	↓↓		0.0606444	1.46121	Up	0.547166	CD0790
105	gi115251040	CD1993	CAJ68871.1		putative decarboxylase (Carboxymuconolactone decarboxylase family)	putative decarboxylase (Carboxymuconolactone decarboxylase family)	2.1.1 Specific pathways	12.43	5.56	Unknown	No	Yes 0.517857	174	3	29	0.230769	0.701254	0.273996	13	91	156	3	29	0.230769	0.701254	0.381396	13	1.39198	CD1993	putative decarboxylase (Carboxymuconolactone decarboxylase family)	2.1.1 Specific pathways	0.477136	1.39198	↑		0.110732	1.92341	Down	-0.943664	CD1993
167	gi115251648	CD2591	CAJ69481.1	ltaE	low-specificity L-threonine aldolase	low-specificity L-threonine aldolase	2.1.1 Specific pathways	37.9	5.63	Cytoplasmic	No	No	81	1	5	0.037037	0.089023	0.0347833	27	152	74	1	5	0.037037	0.089023	0.0484176	27	1.39198	CD2591	low-specificity L-threonine aldolase	2.1.1 Specific pathways	0.477136	1.39198	↑		0.145533	1.60968	Up	0.686772	CD2591
147	gi115250297	CD1263	CAJ68119.1		putative FMN-dependent dehydrogenase	putative FMN-dependent dehydrogenase	2.1.1 Specific pathways	35.53	6.76	Cytoplasmic	No	No	111	2	12	0.105263	0.274275	0.107165	19	133	88	2	7	0.105263	0.274275	0.149172	19	1.39198	CD1263	putative FMN-dependent dehydrogenase	2.1.1 Specific pathways	0.477136	1.39198	↑		0.220944	1.70888	Up	0.773047	CD1263
9	gi115249776	CD0759	CAJ67593.1		formate acetyltransferase	formate acetyltransferase	2.1.1 Specific pathways	83.57	5.58	Cytoplasmic	No	No	1019	21	34	0.636364	3.32876	1.30062	33	19	686	13	17	0.393939	1.47708	0.803348	33	0.617664	CD0759	formate acetyltransferase	2.1.1 Specific pathways	-0.695105	1.619	↓↓		0.227458	1.34749	Up	0.430273	CD0759
76	gi115249127	CD0118	CAJ66938.1		putative subunit of oxidoreductase (putative ferredoxin/flavodoxin oxidoreductase,gamma subunit)	putative subunit of oxidoreductase (putative ferredoxin/flavodoxin oxidoreductase,gamma subunit)	2.1.1 Specific pathways	19.79	5.08	Cytoplasmic	No	No	262	5	28	0.384615	1.42446	0.55657	13	48	278	5	28	0.384615	1.42446	0.774733	13	1.39198	CD0118	putative subunit of oxidoreductase (putative ferredoxin/flavodoxin oxidoreductase,gamma subunit)	2.1.1 Specific pathways	0.477136	1.39198	↑		0.359722	1.28257	Up	0.359034	CD0118
75	gi115251397	CD2342	CAJ69229.1	sucD	succinate-semialdehyde dehydrogenase [NAD(P)+]	succinate-semialdehyde dehydrogenase [NAD(P)+]	2.1.1 Specific pathways	50.69	5.72	Cytoplasmic	No	No	275	5	14	0.142857	0.389495	0.152185	35	89	159	3	8	0.0857143	0.218188	0.118667	35	0.779759	CD2342	succinate-semialdehyde dehydrogenase [NAD(P)+]	2.1.1 Specific pathways	-0.358899	1.28245	↓		0.407312	1.17533	Up	0.23307	CD2342
70	gi115249126	CD0117	CAJ66937.1		putative subunit of oxidoreductase (putative ferredoxin/flavodoxin oxidoreductase,beta subunit)	putative subunit of oxidoreductase (putative ferredoxin/flavodoxin oxidoreductase,beta subunit)	2.1.1 Specific pathways	26.77	6.86	Unknown	No	No	295	6	31	0.666667	3.64159	1.42285	9	83	162	4	16	0.444444	1.78256	0.969494	9	0.681374	CD0117	putative subunit of oxidoreductase (putative ferredoxin/flavodoxin oxidoreductase,beta subunit)	2.1.1 Specific pathways	-0.553482	1.46762	↓		0.415312	1.21235	Up	0.277805	CD0117
72	gi115250207	CD1175	CAJ68028.1	ackA	acetate kinase	acetate kinase	2.1.1 Specific pathways	43.32	5.63	Cytoplasmic	No	No	280	5	15	0.185185	0.53174	0.207763	27	81	164	3	9	0.111111	0.29155	0.158567	27	0.763212	CD1175	acetate kinase	2.1.1 Specific pathways	-0.389844	1.31025	↓		0.579767	1.09556	Up	0.131667	CD1175
80	gi115249125	CD0116	CAJ66936.1		putative oxidoreductase, thiamine diP-binding subunit (2-ketoisovalerate ferredoxin reductase)	putative oxidoreductase, thiamine diP-binding subunit (2-ketoisovalerate ferredoxin reductase)	2.1.1 Specific pathways	39.15	5.39	Cytoplasmic	No	No	254	5	14	0.263158	0.832981	0.325464	19	54	261	5	19	0.263158	0.832981	0.453039	19	1.39198	CD0116	putative oxidoreductase, thiamine diP-binding subunit (2-ketoisovalerate ferredoxin reductase)	2.1.1 Specific pathways	0.477136	1.39198	↑		0.600632	1.13642	Up	0.184499	CD0116
5	gi115252023	CD2966	CAJ69859.1		aldehyde-alcohol dehydrogenase	aldehyde-alcohol dehydrogenase	2.1.1 Specific pathways	94.68	5.88	Cytoplasmic	No	No	1321	26	35	0.38806	1.44377	0.564112	67	4	1136	20	29	0.298507	0.988417	0.537578	67	0.952962	CD2966	aldehyde-alcohol dehydrogenase	2.1.1 Specific pathways	-0.0695095	1.04936	↓		0.695796	1.13858	Up	0.187236	CD2966
83	gi115252540	CD3480	CAJ70383.1	rpiB2	ribose-5-phosphate isomerase 2	ribose-5-phosphate isomerase 2	2.1.1 Specific pathways	16.27	6.18	Cytoplasmic	No	No	244	5	51	0.714286	4.17947	1.63302	7	69	205	5	51	0.714286	4.17947	2.27312	7	1.39198	CD3480	ribose-5-phosphate isomerase 2	2.1.1 Specific pathways	0.477136	1.39198	↑		0.709612	1.05642	Up	0.0791863	CD3480
165	gi115249124	CD0115	CAJ66935.1		ferredoxin (4Fe-4S ferredoxin, iron-sulfur binding domain protein, delta subunit)	ferredoxin (4Fe-4S ferredoxin, iron-sulfur binding domain protein, delta subunit)	2.1.1 Specific pathways	7.69	7.51	Unknown	No	No	85	2	25	0.285714	0.930698	0.363645	7	77	171	3	41	0.428571	1.6827	0.91518	7	2.51669	CD0115	ferredoxin (4Fe-4S ferredoxin, iron-sulfur binding domain protein, delta subunit)	2.1.1 Specific pathways	1.33153	2.51669	↑↑		0.80152	1.07114	Up	0.0991457	CD0115
63	gi115252228	CD3171	CAJ70068.1	gpmI	2,3-bisphosphoglycerate-independent phosphoglycerate mutase	2,3-bisphosphoglycerate-independent phosphoglycerate mutase	2.1.2 Main glycolytic pathways	56.38	5.19	Cytoplasmic	No	No	335	8	22	1.33333	20.5443	8.02714	6	63	218	5	13	0.833333	5.81292	3.16152	6	0.393853	CD3171	2,3-bisphosphoglycerate-independent phosphoglycerate mutase	2.1.2 Main glycolytic pathways	-1.34427	2.53902	↓↓		0.104243	1.70823	Down	-0.772502	CD3171
48	gi115251384	CD2329	CAJ69216.1	tal	transaldolase	transaldolase	2.1.2 Main glycolytic pathways	23.4	5.46	Cytoplasmic	No	No	413	8	45	0.235294	0.719072	0.280958	34	32	422	8	46	0.235294	0.719072	0.391087	34	1.39198	CD2329	transaldolase	2.1.2 Main glycolytic pathways	0.477136	1.39198	↑		0.139112	1.89762	Up	0.92419	CD2329
97	gi115251376	CD2321	CAJ69208.1	tkt	transketolase, central and C-terminal	transketolase, central and C-terminal	2.1.2 Main glycolytic pathways	32.35	5.16	Cytoplasmic	No	No	207	5	19	0.333333	1.15443	0.451064	15	84	162	3	15	0.2	0.584893	0.31811	15	0.705244	CD2321	transketolase, central and C-terminal	2.1.2 Main glycolytic pathways	-0.503805	1.41795	↓		0.159142	2.17366	Up	1.12013	CD2321
103	gi115251377	CD2322	CAJ69209.1	tkt.	transketolase, N Terminal	transketolase, N Terminal	2.1.2 Main glycolytic pathways	29.15	5.83	Cytoplasmic	No	No	180	4	12	0.307692	1.03092	0.402803	13	96	145	3	12	0.230769	0.701254	0.381396	13	0.946856	CD2322	transketolase, N Terminal	2.1.2 Main glycolytic pathways	-0.0787833	1.05613	↓		0.208784	2.27535	Up	1.18609	CD2322
4	gi115252231	CD3174	CAJ70071.1		glyceraldehyde-3-phosphate dehydrogenase 2	glyceraldehyde-3-phosphate dehydrogenase 2	2.1.2 Main glycolytic pathways	36.04	6	Cytoplasmic	No	No	1353	21	54	0.777778	4.99484	1.9516	27	5	1100	18	44	0.666667	3.64159	1.98058	27	1.01485	CD3174	glyceraldehyde-3-phosphate dehydrogenase 2	2.1.2 Main glycolytic pathways	0.0212651	1.01485	↑		0.262258	1.16407	Down	-0.219177	CD3174
12	gi115252229	CD3172	CAJ70069.1	tpi	triosephosphate isomerase	triosephosphate isomerase	2.1.2 Main glycolytic pathways	27.2	5.14	Cytoplasmic	No	No	943	15	59	0.9375	7.65964	2.9928	16	22	635	10	47	0.625	3.21697	1.74963	16	0.584615	CD3172	triosephosphate isomerase	2.1.2 Main glycolytic pathways	-0.774441	1.71053	↓↓		0.298261	1.59854	Down	-0.676753	CD3172
41	gi115252341	CD3285	CAJ70182.1	pgi	glucose-6-phosphate isomerase	glucose-6-phosphate isomerase	2.1.2 Main glycolytic pathways	50.54	5.7	Cytoplasmic	No	No	446	8	22	0.307692	1.03092	0.402803	26	45	291	6	14	0.230769	0.701254	0.381396	26	0.946856	CD3285	glucose-6-phosphate isomerase	2.1.2 Main glycolytic pathways	-0.0787833	1.05613	↓		0.443932	1.3588	Up	0.442328	CD3285
15	gi115249409	CD0403	CAJ67224.1		putative fructose-bisphosphate aldolase	putative fructose-bisphosphate aldolase	2.1.2 Main glycolytic pathways	32.92	5.33	Cytoplasmic	No	No	877	17	51	0.772727	4.92553	1.92452	22	8	960	16	40	0.727273	4.3367	2.35863	22	1.22557	CD0403	putative fructose-bisphosphate aldolase	2.1.2 Main glycolytic pathways	0.293454	1.22557	↑		0.633578	1.32009	Up	0.400639	CD0403
33	gi115252230	CD3173	CAJ70070.1	pgk	phosphoglycerate kinase	phosphoglycerate kinase	2.1.2 Main glycolytic pathways	43.07	5.18	Cytoplasmic	No	No	516	8	29	0.4	1.51189	0.590728	20	75	180	3	11	0.15	0.412538	0.22437	20	0.379819	CD3173	phosphoglycerate kinase	2.1.2 Main glycolytic pathways	-1.39662	2.63283	↓↓		0.895964	1.06351	Down	-0.0888347	CD3173
42	gi115252455	CD3395	CAJ70298.1	pfkA	6-phosphofructokinase	6-phosphofructokinase	2.1.2 Main glycolytic pathways	34.21	7.41	Cytoplasmic	No	No	443	8	27	0.296296	0.978319	0.382251	27	33	416	7	27	0.259259	0.8166	0.44413	27	1.16188	CD3395	6-phosphofructokinase	2.1.2 Main glycolytic pathways	0.216461	1.16188	↑		0.92039	1.03139	Down	-0.0445929	CD3395
13	gi115252227	CD3170	CAJ70067.1		enolase	enolase	2.1.2 Main glycolytic pathways	46.1	4.66	Cytoplasmic	No	No	918	14	43	0.608696	3.06159	1.19623	23	11	857	12	34	0.521739	2.3246	1.2643	23	1.0569	CD3170	enolase	2.1.2 Main glycolytic pathways	0.0798382	1.0569	↑		0.994757	1.00441	Up	0.00634528	CD3170
14	gi115252454	CD3394	CAJ70297.1		pyruvate kinase	pyruvate kinase	2.1.2 Main glycolytic pathways	63.12	5.11	Cytoplasmic	No	No	907	16	32	0.533333	2.41455	0.943419	30	12	855	16	31	0.533333	2.41455	1.31322	30	1.39198	CD3394	pyruvate kinase	2.1.2 Main glycolytic pathways	0.477136	1.39198	↑		0.99761	1.00163	Down	-0.00234637	CD3394
158	gi115252284	CD3227	CAJ70125.1	dapH	2,3,4,5-tetrahydropyridine-2,6-dicarboxylate N-succinyltransferase	2,3,4,5-tetrahydropyridine-2,6-dicarboxylate N-succinyltransferase	2.2 Metabolism of amino acids and related molecules	25.33	5.67	Cytoplasmic	No	No	97	2	8	0.166667	0.467799	0.18278	12	180	56	1	5	0.0833333	0.211528	0.115045	12	0.629419	CD3227	2,3,4,5-tetrahydropyridine-2,6-dicarboxylate N-succinyltransferase	2.2 Metabolism of amino acids and related molecules	-0.667907	1.58877	↓↓		0.0138602	1.34717	Down	-0.429931	CD3227
32	gi115250578	CD1537	CAJ68402.1	aspB	putative glutamate synthase [NADPH] small chain	putative glutamate synthase [NADPH] small chain	2.2 Metabolism of amino acids and related molecules	49.6	5.21	Cytoplasmic	No	No	517	8	26	0.235294	0.719072	0.280958	34	25	571	9	27	0.264706	0.839526	0.456599	34	1.62515	CD1537	putative glutamate synthase [NADPH] small chain	2.2 Metabolism of amino acids and related molecules	0.700574	1.62515	↑↑		0.0185714	1.49975	Up	0.584722	CD1537
175	gi115252294	CD3237	CAJ70135.1	prdF	putative proline racemase	putative proline racemase	2.2 Metabolism of amino acids and related molecules	36.22	5.42	Cytoplasmic	No	No	73	1	4	0.047619	0.115884	0.0452785	21	145	77	1	4	0.047619	0.115884	0.0630267	21	1.39198	CD3237	putative proline racemase	2.2 Metabolism of amino acids and related molecules	0.477136	1.39198	↑		0.0260484	3.38333	Up	1.75844	CD3237
177	gi115250635	CD1594	CAJ68459.1	cysK	putative O-acetylserine sulfhydrylase	putative O-acetylserine sulfhydrylase	2.2 Metabolism of amino acids and related molecules	32.67	5.46	Unknown	No	No	72	1	4	0.047619	0.115884	0.0452785	21	154	72	2	7	0.0952381	0.245197	0.133357	21	2.94526	CD1594	putative O-acetylserine sulfhydrylase	2.2 Metabolism of amino acids and related molecules	1.5584	2.94526	↑↑		0.043428	4.11355	Down	-2.04039	CD1594
34	gi115252729	CD3664	CAJ70573.1		putative amino acid aminotransferase	putative amino acid aminotransferase	2.2 Metabolism of amino acids and related molecules	44.8	5.19	Cytoplasmic	No	No	509	9	26	0.333333	1.15443	0.451064	27	24	579	12	33	0.444444	1.78256	0.969494	27	2.14935	CD3664	putative amino acid aminotransferase	2.2 Metabolism of amino acids and related molecules	1.1039	2.14935	↑↑		0.044183	1.44957	Up	0.535622	CD3664
135	gi115251567	CD2514	CAJ69400.1	tdcB	threonine dehydratase catabolic	threonine dehydratase catabolic	2.2 Metabolism of amino acids and related molecules	42.99	5.43	Cytoplasmic	No	No	135	2	9	0.0833333	0.211528	0.0826487	24	185	54	1	5	0.0416667	0.100694	0.0547653	24	0.662628	CD2514	threonine dehydratase catabolic	2.2 Metabolism of amino acids and related molecules	-0.59373	1.50914	↓↓		0.0599895	1.5973	Up	0.675635	CD2514
73	gi115251674	CD2623	CAJ69509.1		putative alanine racemase (pyridoxal 5'-phosphate-dependent enzyme)	putative alanine racemase (pyridoxal 5'-phosphate-dependent enzyme)	2.2 Metabolism of amino acids and related molecules	26.98	6.01	Cytoplasmic	No	No	280	6	21	0.25	0.778279	0.304091	24	66	209	4	22	0.166667	0.467799	0.254425	24	0.836674	CD2623	putative alanine racemase (pyridoxal 5'-phosphate-dependent enzyme)	2.2 Metabolism of amino acids and related molecules	-0.257262	1.19521	↓		0.132976	1.22015	Up	0.287054	CD2623
77	gi115252282	CD3225	CAJ70123.1	dapA3	dihydrodipicolinate synthase	dihydrodipicolinate synthase	2.2 Metabolism of amino acids and related molecules	31.6	4.89	Cytoplasmic	No	No	261	5	23	0.384615	1.42446	0.55657	13	49	277	5	23	0.384615	1.42446	0.774733	13	1.39198	CD3225	dihydrodipicolinate synthase	2.2 Metabolism of amino acids and related molecules	0.477136	1.39198	↑		0.151004	1.71143	Down	-0.775201	CD3225
151	gi115252280	CD3223	CAJ70121.1	dapA2	dihydrodipicolinate synthase 2	dihydrodipicolinate synthase 2	2.2 Metabolism of amino acids and related molecules	31.79	5.02	Cytoplasmic	No	No	107	2	8	0.181818	0.519911	0.203141	11	78	168	3	13	0.272727	0.873817	0.475249	11	2.3395	CD3223	dihydrodipicolinate synthase 2	2.2 Metabolism of amino acids and related molecules	1.2262	2.3395	↑↑		0.179827	1.61611	Down	-0.692521	CD3223
192	gi115251108	CD2054	CAJ68939.1	lysC	aspartokinase	aspartokinase	2.2 Metabolism of amino acids and related molecules	43.22	5.08	Cytoplasmic	No	No	60	1	4	0.03125	0.0746078	0.029151	32	182	55	1	4	0.03125	0.0746078	0.0405775	32	1.39198	CD2054	aspartokinase	2.2 Metabolism of amino acids and related molecules	0.477136	1.39198	↑		0.203871	1.161	Up	0.215366	CD2054
35	gi115252300	CD3244	CAJ70141.1	prdA	D-proline reductase subunit proprotein	D-proline reductase subunit proprotein	2.2 Metabolism of amino acids and related molecules	67.63	4.73	Cytoplasmic	No	No	487	8	16	0.307692	1.03092	0.402803	26	39	358	7	14	0.269231	0.858792	0.467077	26	1.15957	CD3244	D-proline reductase subunit proprotein	2.2 Metabolism of amino acids and related molecules	0.213588	1.15957	↑		0.236892	1.84855	Up	0.886393	CD3244
208	gi115252633	CD3570	CAJ70476.1		probable dipeptidase, M19 family	probable dipeptidase, M19 family	2.2 Metabolism of amino acids and related molecules	35.5	5.69	Cytoplasmic	No	No	54	1	4	0.0357143	0.0857111	0.0334893	28	115	115	2	8	0.0714286	0.178769	0.0972282	28	2.90326	CD3570	probable dipeptidase, M19 family	2.2 Metabolism of amino acids and related molecules	1.53768	2.90326	↑↑		0.3157	1.23295	Up	0.302112	CD3570
8	gi115249129	CD0120	CAJ66940.1		glucosamine--fructose-6-phosphate aminotransferase [isomerizing]	glucosamine--fructose-6-phosphate aminotransferase [isomerizing]	2.2 Metabolism of amino acids and related molecules	67.43	5.31	Cytoplasmic	No	No	1027	18	39	0.545455	2.51119	0.98118	33	27	542	9	21	0.272727	0.873817	0.475249	33	0.484365	CD0120	glucosamine--fructose-6-phosphate aminotransferase [isomerizing]	2.2 Metabolism of amino acids and related molecules	-1.04583	2.06456	↓↓		0.317946	1.09154	Down	-0.126371	CD0120
129	gi115251664	CD2613	CAJ69499.1		probable peptidase, M24 family, cleaving Xaa-Pro dipeptides	probable peptidase, M24 family, cleaving Xaa-Pro dipeptides	2.2 Metabolism of amino acids and related molecules	39.83	4.92	Cytoplasmic	No	No	147	3	9	0.136364	0.368875	0.144128	22	114	117	2	6	0.0909091	0.232847	0.12664	22	0.878666	CD2613	probable peptidase, M24 family, cleaving Xaa-Pro dipeptides	2.2 Metabolism of amino acids and related molecules	-0.186613	1.13809	↓		0.332287	1.8954	Down	-0.922506	CD2613
166	gi115250736	CD1693	CAJ68560.1		putative dinitrogenase iron-molybdenum cofactor	putative dinitrogenase iron-molybdenum cofactor	2.2 Metabolism of amino acids and related molecules	12.92	5.93	Cytoplasmic	No	No	83	2	25	0.5	2.16228	0.844851	4	155	70	2	18	0.5	2.16228	1.17601	4	1.39198	CD1693	putative dinitrogenase iron-molybdenum cofactor	2.2 Metabolism of amino acids and related molecules	0.477136	1.39198	↑		0.362588	1.18897	Down	-0.249709	CD1693
128	gi115252096	CD3041	CAJ69934.1	pepI	proline iminopeptidase	proline iminopeptidase	2.2 Metabolism of amino acids and related molecules	33.67	5.27	Cytoplasmic	No	No	149	3	12	0.214286	0.637894	0.24924	14	138	84	1	5	0.0714286	0.178769	0.0972282	14	0.390099	CD3041	proline iminopeptidase	2.2 Metabolism of amino acids and related molecules	-1.35809	2.56345	↓↓		0.412039	1.16301	Up	0.21787	CD3041
6	gi115249401	CD0395	CAJ67216.1	hadA	isocaprenoyl-CoA:2-hydroxyisocaproate CoA-transferase	isocaprenoyl-CoA:2-hydroxyisocaproate CoA-transferase	2.2 Metabolism of amino acids and related molecules	44.24	5.3	Cytoplasmic	No	No	1180	21	48	0.777778	4.99484	1.9516	27	6	1078	22	50	0.814815	5.52852	3.00684	27	1.5407	CD0395	isocaprenoyl-CoA:2-hydroxyisocaproate CoA-transferase	2.2 Metabolism of amino acids and related molecules	0.623591	1.5407	↑↑		0.570033	1.16801	Down	-0.224054	CD0395
139	gi115249398	CD0392	CAJ67213.1		Radical SAM-superfamily protein	Radical SAM-superfamily protein	2.2 Metabolism of amino acids and related molecules	22.72	5.37	Cytoplasmic	No	No	124	2	12	0.181818	0.519911	0.203141	11	119	111	2	14	0.181818	0.519911	0.282768	11	1.39198	CD0392	Radical SAM-superfamily protein	2.2 Metabolism of amino acids and related molecules	0.477136	1.39198	↑		0.727461	1.05991	Up	0.0839354	CD0392
18	gi115249404	CD0398	CAJ67219.1		subunit of oxygen-sensitive 2-hydroxyisocaproyl-CoA dehydratase	subunit of oxygen-sensitive 2-hydroxyisocaproyl-CoA dehydratase	2.2 Metabolism of amino acids and related molecules	42.37	5.39	Cytoplasmic	No	No	808	13	38	0.433333	1.71227	0.669024	30	14	785	14	40	0.466667	1.92864	1.04895	30	1.56788	CD0398	subunit of oxygen-sensitive 2-hydroxyisocaproyl-CoA dehydratase	2.2 Metabolism of amino acids and related molecules	0.648811	1.56788	↑↑		0.755279	1.11733	Up	0.160062	CD0398
40	gi115249403	CD0397	CAJ67218.1	hadB	subunit of oxygen-sensitive 2-hydroxyisocaproyl-CoA dehydratase	subunit of oxygen-sensitive 2-hydroxyisocaproyl-CoA dehydratase	2.2 Metabolism of amino acids and related molecules	46.6	5.06	Cytoplasmic	No	No	446	8	26	0.333333	1.15443	0.451064	24	37	376	8	19	0.333333	1.15443	0.627871	24	1.39198	CD0397	subunit of oxygen-sensitive 2-hydroxyisocaproyl-CoA dehydratase	2.2 Metabolism of amino acids and related molecules	0.477136	1.39198	↑		0.800142	1.09312	Up	0.128457	CD0397
132	gi115249115	CD0107	CAJ66926.1	aspC	aspartate aminotransferase	aspartate aminotransferase	2.2 Metabolism of amino acids and related molecules	44.11	5.36	Cyt Membrane	No	Yes 0.629863	135	2	6	0.0769231	0.193777	0.0757129	26	141	81	1	4	0.0384615	0.0926009	0.0503635	26	0.66519	CD0107	aspartate aminotransferase	2.2 Metabolism of amino acids and related molecules	-0.588161	1.50333	↓↓		0.824494	1.0389	Down	-0.0550518	CD0107
26	gi115249724	CD0708	CAJ67541.1		putative aminoacyl-histidine dipeptidase	putative aminoacyl-histidine dipeptidase	2.2 Metabolism of amino acids and related molecules	52.56	5	Cytoplasmic	No	No	616	11	29	0.392857	1.47091	0.574718	28	28	541	10	26	0.357143	1.27585	0.693904	28	1.20738	CD0708	putative aminoacyl-histidine dipeptidase	2.2 Metabolism of amino acids and related molecules	0.27188	1.20738	↑		0.860184	1.05451	Up	0.0765677	CD0708
215	gi115251586	CD2532	CAJ69419.1		putative aminotransferase (alanine--glyoxylate transaminase)	putative aminotransferase (alanine--glyoxylate transaminase)	2.2 Metabolism of amino acids and related molecules	42.37	5.04	Cytoplasmic	No	No	48	1	3	0.05	0.122018	0.0476754	20	85	161	3	11	0.15	0.412538	0.22437	20	4.7062	CD2532	putative aminotransferase (alanine--glyoxylate transaminase)	2.2 Metabolism of amino acids and related molecules	2.23456	4.7062	↑↑		0.962534	1.01109	Down	-0.0159118	CD2532
19	gi115249189	CD0179	CAJ67001.1		NAD-specific glutamate dehydrogenase	NAD-specific glutamate dehydrogenase	2.2 Metabolism of aminoacids and related molecules	46.02	5.23	Cytoplasmic	No	No	769	14	43	0.451613	1.82887	0.714581	31	7	1022	19	48	0.612903	3.10113	1.68663	31	2.36031	CD0179	NAD-specific glutamate dehydrogenase	2.2 Metabolism of aminoacids and related molecules	1.23898	2.36031	↑↑		0.50965	1.16285	Down	-0.217665	CD0179
148	gi115251455	CD2403	CAJ69288.1	dut	deoxyuridine 5'-triphosphate nucleotidohydrolase (dUTPase)	deoxyuridine 5'-triphosphate nucleotidohydrolase (dUTPase)	2.3 Metabolism of nucleotides and nucleic acids	15.82	6.94	Cytoplasmic	No	No	110	2	21	0.2	0.584893	0.228531	10	147	76	2	21	0.2	0.584893	0.31811	10	1.39198	CD2403	deoxyuridine 5'-triphosphate nucleotidohydrolase (dUTPase)	2.3 Metabolism of nucleotides and nucleic acids	0.477136	1.39198	↑		0.0331545	2.81293	Up	1.49207	CD2403					gel+array
118	gi115252575	CD3514	CAJ70418.1	prs	ribose-phosphate pyrophosphokinase	ribose-phosphate pyrophosphokinase	2.3 Metabolism of nucleotides and nucleic acids	34.23	5.6	Cytoplasmic	No	No	160	3	16	0.3	0.995262	0.388872	10	136	85	2	10	0.2	0.584893	0.31811	10	0.818034	CD3514	ribose-phosphate pyrophosphokinase	2.3 Metabolism of nucleotides and nucleic acids	-0.289767	1.22244	↓		0.0662337	1.34645	Up	0.429156	CD3514
68	gi115250577	CD1536	CAJ68401.1		putative dehydrogenase, electron transfer subunit (Ferredoxin--NADP(+) reductase)	putative dehydrogenase, electron transfer subunit (Ferredoxin--NADP(+) reductase)	2.3 Metabolism of nucleotides and nucleic acids	33.04	5.74	Cytoplasmic	No	No	304	5	23	0.333333	1.15443	0.451064	15	64	213	3	18	0.2	0.584893	0.31811	15	0.705244	CD1536	putative dehydrogenase, electron transfer subunit (Ferredoxin--NADP(+) reductase)	2.3 Metabolism of nucleotides and nucleic acids	-0.503805	1.41795	↓		0.099929	1.50476	Up	0.589536	CD1536
31	gi115249098	CD0091	CAJ66909.1		adenylate kinase	adenylate kinase	2.3 Metabolism of nucleotides and nucleic acids	23.7	5.53	Cytoplasmic	No	No	519	10	49	0.588235	2.87468	1.1232	17	42	310	7	40	0.411765	1.58086	0.859795	17	0.765486	CD0091	adenylate kinase	2.3 Metabolism of nucleotides and nucleic acids	-0.385552	1.30636	↓		0.122487	1.31198	Up	0.391749	CD0091
137	gi115251797	CD2745	CAJ69632.1	apt	adenine phosphoribosyltransferase	adenine phosphoribosyltransferase	2.3 Metabolism of nucleotides and nucleic acids	18.77	4.98	Cytoplasmic	No	No	130	2	20	0.285714	0.930698	0.363645	7	200	45	1	13	0.142857	0.389495	0.211838	7	0.58254	CD2745	adenine phosphoribosyltransferase	2.3 Metabolism of nucleotides and nucleic acids	-0.77957	1.71662	↓↓		0.13369	1.81039	Up	0.856297	CD2745
171	gi115251756	CD2705	CAJ69591.1		putative amidohydrolas	putative amidohydrolas	2.3 Metabolism of nucleotides and nucleic acids	50.68	5.74	Cytoplasmic	No	No	78	2	7	0.0526316	0.128838	0.0503399	38	106	129	3	10	0.0789474	0.199354	0.108424	38	2.15384	CD2705	putative amidohydrolas	2.3 Metabolism of nucleotides and nucleic acids	1.10691	2.15384	↑↑		0.253639	1.44691	Up	0.532971	CD2705
45	gi115251390	CD2335	CAJ69222.1	guaB	inosine-5'-monophosphate dehydrogenase (IMP dehydrogenase)	inosine-5'-monophosphate dehydrogenase (IMP dehydrogenase)	2.3 Metabolism of nucleotides and nucleic acids	54.78	5.52	Cytoplasmic	No	No	422	8	24	0.235294	0.719072	0.280958	34	40	348	6	16	0.176471	0.501311	0.272652	34	0.970436	CD2335	inosine-5'-monophosphate dehydrogenase (IMP dehydrogenase)	2.3 Metabolism of nucleotides and nucleic acids	-0.0432953	1.03046	↓		0.317946	1.3694	Up	0.453549	CD2335
67	gi115249206	CD0198	CAJ67019.1	guaA	GMP synthase [glutamine-hydrolyzing] Glutamine amidotransferase	GMP synthase [glutamine-hydrolyzing] Glutamine amidotransferase	2.3 Metabolism of nucleotides and nucleic acids	57.33	5.37	Cytoplasmic	No	No	304	6	15	0.1875	0.539927	0.210962	32	117	112	2	7	0.0625	0.154782	0.0841824	32	0.399041	CD0198	GMP synthase [glutamine-hydrolyzing] Glutamine amidotransferase	2.3 Metabolism of nucleotides and nucleic acids	-1.32539	2.50601	↓↓		0.526889	1.05388	Down	-0.0757049	CD0198
93	gi115249197	CD0187	CAJ67009.1	pyrE	orotate phosphoribosyltransferase	orotate phosphoribosyltransferase	2.3 Metabolism of nucleotides and nucleic acids	21.3	6	Cytoplasmic	No	No	215	4	20	0.190476	0.550516	0.215099	21	43	309	5	34	0.238095	0.730196	0.397137	21	1.8463	CD0187	orotate phosphoribosyltransferase	2.3 Metabolism of nucleotides and nucleic acids	0.884636	1.8463	↑↑		0.707981	1.2361	Down	-0.305793	CD0187
53	gi115251566	CD2513	CAJ69399.1		putative translation inhibitor endoribonuclease	putative translation inhibitor endoribonuclease	2.3 Metabolism of nucleotides and nucleic acids	13.6	4.91	Cytoplasmic	No	No	383	7	68	1.16667	13.678	5.3443	6	53	262	4	68	0.666667	3.64159	1.98058	6	0.370596	CD2513	putative translation inhibitor endoribonuclease	2.3 Metabolism of nucleotides and nucleic acids	-1.43208	2.69836	↓↓		0.713692	1.13001	Up	0.17633	CD2513
145	gi115251192	CD2138	CAJ69023.1	pyrH	uridylate kinase (Uridine monophosphate kinase)	uridylate kinase (Uridine monophosphate kinase)	2.3 Metabolism of nucleotides and nucleic acids	25.83	6.12	Cytoplasmic	No	No	114	3	12	0.166667	0.467799	0.18278	18	150	75	2	8	0.111111	0.29155	0.158567	18	0.867532	CD2138	uridylate kinase (Uridine monophosphate kinase)	2.3 Metabolism of nucleotides and nucleic acids	-0.205012	1.1527	↓		0.854153	1.04472	Up	0.0631097	CD2138
30	gi115250077	CD1056	CAJ67897.1		electron transfer flavoprotein alpha-subunit	electron transfer flavoprotein alpha-subunit	2.4 Metabolism of Lipids	36.08	5.23	Cytoplasmic	No	No	523	9	37	0.333333	1.15443	0.451064	27	34	410	8	32	0.296296	0.978319	0.532085	27	1.17962	CD1056	electron transfer flavoprotein alpha-subunit	2.4 Metabolism of Lipids	0.238326	1.17962	↑		0.00971802	1.67187	Up	0.741462	CD1056
81	gi115250075	CD1054	CAJ67895.1	bcd2	butyryl-CoA dehydrogenase	butyryl-CoA dehydrogenase	2.4 Metabolism of Lipids	41.31	5.87	Cytoplasmic	No	No	252	5	18	0.192308	0.557068	0.217659	26	55	258	5	17	0.192308	0.557068	0.302977	26	1.39198	CD1054	butyryl-CoA dehydrogenase	2.4 Metabolism of Lipids	0.477136	1.39198	↑		0.0363008	2.83711	Up	1.50442	CD1054
217	gi115249137	CD0128	CAJ66948.1	fabZ	(3R)-hydroxymyristoyl-[acyl carrier protein] dehydratase	(3R)-hydroxymyristoyl-[acyl carrier protein] dehydratase	2.4 Metabolism of lipids	15.86	7.28	Cytoplasmic	No	No	47	1	6	0.0769231	0.193777	0.0757129	13	186	53	1	6	0.0769231	0.193777	0.105391	13	1.39198	CD0128	(3R)-hydroxymyristoyl-[acyl carrier protein] dehydratase	2.4 Metabolism of lipids	0.477136	1.39198	↑		0.0621551	1.43211	Up	0.518147	CD0128
115	gi115251396	CD2341	CAJ69228.1	abfD	gamma-aminobutyrate metabolism dehydratase/isomerase	gamma-aminobutyrate metabolism dehydratase/isomerase	2.4 Metabolism of lipids	55.11	6.19	Cytoplasmic	No	No	164	3	7	0.12	0.318257	0.12435	25	168	63	1	3	0.04	0.0964782	0.0524723	25	0.421972	CD2341	gamma-aminobutyrate metabolism dehydratase/isomerase	2.4 Metabolism of lipids	-1.24478	2.36982	↓↓		0.0690824	1.13376	Up	0.181115	CD2341
23	gi115250076	CD1055	CAJ67896.1		electron transfer flavoprotein beta-subunit	electron transfer flavoprotein beta-subunit	2.4 Metabolism of Lipids	28.91	4.95	Cytoplasmic	No	No	660	12	42	0.545455	2.51119	0.98118	22	13	809	15	45	0.681818	3.80638	2.0702	22	2.10991	CD1055	electron transfer flavoprotein beta-subunit	2.4 Metabolism of Lipids	1.07718	2.10991	↑↑		0.0752484	1.7417	Up	0.800496	CD1055
219	gi115250078	CD1057	CAJ67898.1	crt2	3-hydroxybutyryl-CoA dehydratase (Crotonase)	3-hydroxybutyryl-CoA dehydratase (Crotonase)	2.4 Metabolism of lipids	28.44	5.05	Cytoplasmic	No	No	46	1	5	0.0833333	0.211528	0.0826487	12	139	83	2	8	0.166667	0.467799	0.254425	12	3.0784	CD1057	3-hydroxybutyryl-CoA dehydratase (Crotonase)	2.4 Metabolism of lipids	1.62218	3.0784	↑↑		0.134312	1.46553	Up	0.551427	CD1057
29	gi115250079	CD1058	CAJ67899.1		3-hydroxybutyryl-CoA dehydrogenase	3-hydroxybutyryl-CoA dehydrogenase	2.4 Metabolism of lipids	30.68	6.16	Unknown	No	No	537	11	47	0.578947	2.79269	1.09117	19	26	556	10	37	0.526316	2.35982	1.28345	19	1.17622	CD1058	3-hydroxybutyryl-CoA dehydrogenase	2.4 Metabolism of lipids	0.234156	1.17622	↑		0.158076	1.17797	Up	0.236303	CD1058
22	gi115249405	CD0399	CAJ67220.1		acyl-CoA dehydrogenase, short-chain specific	acyl-CoA dehydrogenase, short-chain specific	2.4 Metabolism of lipids	40.87	6.82	Cytoplasmic	No	No	666	11	28	0.423077	1.64897	0.64429	26	20	662	11	31	0.423077	1.64897	0.896837	26	1.39198	CD0399	acyl-CoA dehydrogenase, short-chain specific	2.4 Metabolism of lipids	0.477136	1.39198	↑		0.695796	1.15645	Up	0.209699	CD0399
10	gi115250080	CD1059	CAJ67900.1		acetyl-CoA acetyltransferase	acetyl-CoA acetyltransferase	2.4 Metabolism of lipids	40.86	5.31	Cytoplasmic	No	No	997	17	41	0.944444	7.79923	3.04733	18	9	891	15	39	0.833333	5.81292	3.16152	18	1.03747	CD1059	acetyl-CoA acetyltransferase	2.4 Metabolism of lipids	0.0530686	1.03747	↑		0.981676	1.00745	Up	0.0107145	CD1059
174	gi115252223	CD3167	CAJ70063.1		putative phosphatidylethanolamine-binding regulatory protein	putative phosphatidylethanolamine-binding regulatory protein	2.4 Metabolism of lipids	18.33	5.06	Unknown	No	No	75	1	8	0.25	0.778279	0.304091	4	148	76	1	8	0.25	0.778279	0.423289	4	1.39198	CD3167	putative phosphatidylethanolamine-binding regulatory protein	2.4 Metabolism of lipids	0.477136	1.39198	↑		0.999854	1.00009	Up	0.000131279	CD3167
193	gi115249811	CD0794	CAJ67628.1	nadE	NH3-dependent NAD(+) synthetase	NH3-dependent NAD(+) synthetase	2.5 Metabolism of coenzymes and prosthetic groups	28.02	5.07	Cytoplasmic	No	No	58	1	6	0.047619	0.115884	0.0452785	21	144	79	1	6	0.047619	0.115884	0.0630267	21	1.39198	CD0794	NH3-dependent NAD(+) synthetase	2.5 Metabolism of coenzymes and prosthetic groups	0.477136	1.39198	↑		0.284603	1.49049	Up	0.575785	CD0794
95	gi115252479	CD3419	CAJ70322.1	hemB	delta-aminolevulinic acid dehydratase	delta-aminolevulinic acid dehydratase	2.5 Metabolism of coenzymes and prosthetic groups	36.18	5.08	Cytoplasmic	Yes LRA-SK 12-13	No	211	3	14	0.272727	0.873817	0.34142	11	79	168	4	15	0.363636	1.31013	0.71255	11	2.08702	CD3419	delta-aminolevulinic acid dehydratase	2.5 Metabolism of coenzymes and prosthetic groups	1.06144	2.08702	↑↑		0.293542	1.33108	Down	-0.4126	CD3419
65	gi115249735	CD0718	CAJ67552.1	fhs	formate--tetrahydrofolate ligase	formate--tetrahydrofolate ligase	2.5 Metabolism of coenzymes and prosthetic groups	59.99	5.86	Cytoplasmic	No	No	319	6	17	0.146341	0.400688	0.156558	41	62	222	4	10	0.097561	0.251875	0.136989	41	0.875006	CD0718	formate--tetrahydrofolate ligase	2.5 Metabolism of coenzymes and prosthetic groups	-0.192636	1.14285	↓		0.538543	1.17361	Up	0.230947	CD0718
46	gi115249342	CD0333	CAJ67155.1	ppaC	manganese-dependent inorganic pyrophosphatase	manganese-dependent inorganic pyrophosphatase	2.6 Metabolism of phosphate	59.3	5.05	Cytoplasmic	No	No	418	8	18	0.25	0.778279	0.304091	32	36	378	7	16	0.21875	0.654817	0.35614	32	1.17116	CD0333	manganese-dependent inorganic pyrophosphatase	2.6 Metabolism of phosphate	0.22794	1.17116	↑		0.135828	1.30183	Up	0.380542	CD0333
111	gi115249009	CD0006	CAJ66820.1	gyrA	DNA gyrase subunit A	DNA gyrase subunit A	3.4 DNA packaging and segregation	91.11	6.89	Cytoplasmic	No	No	166	3	6	0.0340909	0.0816603	0.0319065	88	130	92	2	2	0.0227273	0.053725	0.0292198	88	0.915793	CD0006	DNA gyrase subunit A	3.4 DNA packaging and segregation	-0.126907	1.09195	↓		0.909415	1.03716	Up	0.0526385	CD0006
190	gi115249013	CD0010	CAJ66824.1	rsbW	anti-sigma-B factor (serine-protein kinase) RsbW	anti-sigma-B factor (serine-protein kinase) RsbW	3.5.1 Transcription initiation	14.86	4.59	Cytoplasmic	No	No	61	1	12	0.142857	0.389495	0.152185	7	171	61	1	12	0.142857	0.389495	0.211838	7	1.39198	CD0010	anti-sigma-B factor (serine-protein kinase) RsbW	3.5.1 Transcription initiation	0.477136	1.39198	↑		0.359722	1.11071	Down	-0.151479	CD0010
104	gi115249180	CD0171	CAJ66992.1	rex	putative DNA-binding protein (Transcriptional regulator, Redox-sensing repressor Rex )	putative DNA-binding protein (Transcriptional regulator, Redox-sensing repressor Rex )	3.5.2 RNA synthesis Regulation	23.31	8.07	Cytoplasmic	No	No	179	3	17	0.25	0.778279	0.304091	12	127	96	2	8	0.166667	0.467799	0.254425	12	0.836674	CD0171	putative DNA-binding protein (Transcriptional regulator, Redox-sensing repressor Rex )	3.5.2 RNA synthesis Regulation	-0.257262	1.19521	↓		0.240985	1.19878	Up	0.261567	CD0171
143	gi115250371	CD1335	CAJ68193.1		MarR-family transcriptional regulator	MarR-family transcriptional regulator	3.5.2 RNA synthesis Regulation	17.58	8.45	Cytoplasmic	No	Yes 0.505274	119	3	20	0.166667	0.467799	0.18278	18	149	75	2	13	0.111111	0.29155	0.158567	18	0.867532	CD1335	MarR-family transcriptional regulator	3.5.2 RNA synthesis Regulation	-0.205012	1.1527	↓		0.632094	1.14732	Down	-0.198273	CD1335
36	gi115249070	CD0066	CAJ66881.1	rpoB	DNA-directed RNA polymerase beta chain	DNA-directed RNA polymerase beta chain	3.5.3 Transcription elongation	139.34	4.87	Cytoplasmic	No	No	480	8	8	0.0888889	0.227125	0.088743	90	92	151	3	3	0.0333333	0.0797752	0.0433879	90	0.488916	CD0066	DNA-directed RNA polymerase beta chain	3.5.3 Transcription elongation	-1.03234	2.04534	↓↓		0.32502	1.15219	Up	0.204373	CD0066
85	gi115252616	CD3553	CAJ70459.1	greA	transcription elongation factor greA (Transcript cleavage factor GreA)	transcription elongation factor greA (Transcript cleavage factor GreA)	3.5.3 Transcription elongation	18.02	4.64	Cytoplasmic	No	No	239	5	27	0.277778	0.895736	0.349984	18	142	81	2	17	0.111111	0.29155	0.158567	18	0.45307	CD3553	transcription elongation factor greA (Transcript cleavage factor GreA)	3.5.3 Transcription elongation	-1.1422	2.20717	↓↓		0.92421	1.02487	Down	-0.0354381	CD3553
69	gi115249106	CD0098	CAJ66917.1	rpoA	DNA-directed RNA polymerase alpha chain	DNA-directed RNA polymerase alpha chain	3.5.3 Transcription elongation	34.92	4.69	Cytoplasmic	No	No	297	6	22	0.25	0.778279	0.304091	24	82	163	4	15	0.166667	0.467799	0.254425	24	0.836674	CD0098	DNA-directed RNA polymerase alpha chain	3.5.3 Transcription elongation	-0.257262	1.19521	↓		0.991082	1.00283	Up	0.00408037	CD0098
222	gi115249071	CD0067	CAJ66882.1	rpoC	DNA-directed RNA polymerase beta' chain	DNA-directed RNA polymerase beta' chain	3.5.3 Transcription elongation	129.75	7.95	Cytoplasmic	No	No	45	1	1	0.00917431	0.0213493	0.00834167	109	163	66	2	2	0.0183486	0.0431545	0.0234707	109	2.81367	CD0067	DNA-directed RNA polymerase beta' chain	3.5.3 Transcription elongation	1.49245	2.81367	↑↑		0.991783	1.00386	Down	-0.00555607	CD0067
149	gi115249104	CD0096	CAJ66915.1	rpsK	30S ribosomal protein S11	30S ribosomal protein S11	3.7.1 Protein Synthesis ribosomal proteins	14.44	11.3	Cytoplasmic	No	No	109	2	10	0.285714	0.930698	0.363645	7	116	112	2	10	0.285714	0.930698	0.506185	7	1.39198	CD0096	30S ribosomal protein S11	3.7.1 Protein Synthesis ribosomal proteins	0.477136	1.39198	↑		0.0282244	1.77448	Up	0.8274	CD0096
62	gi115249091	CD0085	CAJ66902.1	rpsH	30S ribosomal protein S8	30S ribosomal protein S8	3.7.1 Protein Synthesis ribosomal proteins	14.68	9.21	Cytoplasmic	No	No	336	6	52	0.352941	1.25393	0.48994	17	38	364	8	49	0.470588	1.95521	1.06339	17	2.17046	CD0085	30S ribosomal protein S8	3.7.1 Protein Synthesis ribosomal proteins	1.118	2.17046	↑↑		0.0367623	1.88098	Up	0.911487	CD0085
55	gi115249103	CD0095	CAJ66914.1	rpsM	30S ribosomal protein S13	30S ribosomal protein S13	3.7.1 Protein Synthesis ribosomal proteins	14.09	10.3	Cytoplasmic	No	No	372	6	34	0.333333	1.15443	0.451064	18	46	290	5	30	0.277778	0.895736	0.48717	18	1.08005	CD0095	30S ribosomal protein S13	3.7.1 Protein Synthesis ribosomal proteins	0.111095	1.08005	↑		0.0782162	1.81214	Up	0.857692	CD0095
61	gi115249089	CD0084	CAJ66900.1	rplE	50S ribosomal protein L5	50S ribosomal protein L5	3.7.1 Protein Synthesis ribosomal proteins	20.44	9.48	Cytoplasmic	No	No	336	7	31	0.269231	0.858792	0.335549	26	123	101	2	14	0.0769231	0.193777	0.105391	26	0.314084	CD0084	50S ribosomal protein L5	3.7.1 Protein Synthesis ribosomal proteins	-1.67078	3.18386	↓↓		0.0876407	1.852	Up	0.889085	CD0084
138	gi115249092	CD0086	CAJ66903.1	rplF	50S ribosomal protein L6	50S ribosomal protein L6	3.7.1 Protein Synthesis ribosomal proteins	19.97	9.85	Cytoplasmic	No	No	124	3	26	0.166667	0.467799	0.18278	18	169	62	2	12	0.111111	0.29155	0.158567	18	0.867532	CD0086	50S ribosomal protein L6	3.7.1 Protein Synthesis ribosomal proteins	-0.205012	1.1527	↓		0.104542	1.51454	Up	0.598881	CD0086
100	gi115249088	CD0083	CAJ66899.1	rplX	50S ribosomal protein L24	50S ribosomal protein L24	3.7.1 Protein Synthesis ribosomal proteins	11.09	10.1	Unknown	No	Yes 0.907242	192	4	37	0.333333	1.15443	0.451064	12	99	137	3	26	0.25	0.778279	0.423289	12	0.938423	CD0083	50S ribosomal protein L24	3.7.1 Protein Synthesis ribosomal proteins	-0.0916902	1.06562	↓		0.125401	1.72558	Up	0.787085	CD0083
130	gi115249093	CD0087	CAJ66904.1	rplR	50S ribosomal protein L18	50S ribosomal protein L18	3.7.1 Protein Synthesis ribosomal proteins	13.58	10.2	Cytoplasmic	No	No	141	3	27	0.230769	0.701254	0.273996	13	107	127	3	27	0.230769	0.701254	0.381396	13	1.39198	CD0087	50S ribosomal protein L18	3.7.1 Protein Synthesis ribosomal proteins	0.477136	1.39198	↑		0.125711	1.36408	Up	0.447926	CD0087
51	gi115249067	CD0063	CAJ66878.1	rplJ	50S ribosomal protein L10	50S ribosomal protein L10	3.7.1 Protein Synthesis ribosomal proteins	18.6	6.24	Unknown	No	No	396	7	41	0.368421	1.33572	0.521897	19	102	135	3	20	0.157895	0.43845	0.238463	19	0.456916	CD0063	50S ribosomal protein L10	3.7.1 Protein Synthesis ribosomal proteins	-1.13	2.18859	↓↓		0.138702	1.27943	Down	-0.3555	CD0063
117	gi115250193	CD1161	CAJ68014.1	rplU	50S ribosomal protein L21	50S ribosomal protein L21	3.7.1 Protein Synthesis ribosomal proteins	11.33	9.58	Unknown	No	Yes 0.551236	163	3	42	0.25	0.778279	0.304091	12	97	139	3	42	0.25	0.778279	0.423289	12	1.39198	CD1161	50S ribosomal protein L21	3.7.1 Protein Synthesis ribosomal proteins	0.477136	1.39198	↑		0.226415	1.38373	Up	0.468561	CD1161
50	gi115249094	CD0088	CAJ66905.1	rpsE	30S ribosomal protein S5	30S ribosomal protein S5	3.7.1 Protein Synthesis ribosomal proteins	17.85	9.82	Cytoplasmic	No	No	398	7	50	0.411765	1.58086	0.617678	17	88	159	4	40	0.235294	0.719072	0.391087	17	0.633156	CD0088	30S ribosomal protein S5	3.7.1 Protein Synthesis ribosomal proteins	-0.659366	1.57939	↓↓		0.242714	1.24075	Up	0.311215	CD0088
131	gi115249085	CD0080A	CAJ66896.1	rpmC	50S ribosomal protein L29	50S ribosomal protein L29	3.7.1 Protein Synthesis ribosomal proteins	7.85	9.76	Cytoplasmic	No	No	136	3	44	0.375	1.37137	0.535827	8	121	106	2	29	0.25	0.778279	0.423289	8	0.789973	CD0080A	50S ribosomal protein L29	3.7.1 Protein Synthesis ribosomal proteins	-0.340125	1.26587	↓		0.242714	1.7207	Up	0.782993	CD0080A
37	gi115249066	CD0062	CAJ66877.1	rplA	50S ribosomal protein L1	50S ribosomal protein L1	3.7.1 Protein Synthesis ribosomal proteins	24.81	9.42	Cytoplasmic	No	No	479	7	39	0.28	0.905461	0.353784	25	52	268	4	23	0.16	0.44544	0.242265	25	0.684781	CD0062	50S ribosomal protein L1	3.7.1 Protein Synthesis ribosomal proteins	-0.546285	1.46032	↓		0.243625	1.14566	Down	-0.196181	CD0062
60	gi115249096	CD0089	CAJ66907.1	rplO	50S ribosomal protein L15	50S ribosomal protein L15	3.7.1 Protein Synthesis ribosomal proteins	15.81	10.4	Unknown	No	No	339	7	40	0.304348	1.01534	0.396715	23	73	184	4	30	0.173913	0.492496	0.267857	23	0.675187	CD0089	50S ribosomal protein L15	3.7.1 Protein Synthesis ribosomal proteins	-0.566641	1.48107	↓		0.264643	1.16214	Down	-0.21678	CD0089
52	gi115249105	CD0097	CAJ66916.1	rpsD	30S ribosomal protein S4	30S ribosomal protein S4	3.7.1 Protein Synthesis ribosomal proteins	23.57	9.75	Cytoplasmic	No	No	391	7	30	0.212121	0.629751	0.246058	33	47	290	5	23	0.151515	0.417474	0.227055	33	0.922769	CD0097	30S ribosomal protein S4	3.7.1 Protein Synthesis ribosomal proteins	-0.115958	1.08369	↓		0.306825	1.28909	Up	0.366349	CD0097
59	gi115249113	CD0105	CAJ66924.1	rpsI	30S ribosomal protein S9	30S ribosomal protein S9	3.7.1 Protein Synthesis ribosomal proteins	14.55	10.4	Unknown	No	No	348	6	48	0.352941	1.25393	0.48994	17	35	378	6	48	0.352941	1.25393	0.681986	17	1.39198	CD0105	30S ribosomal protein S9	3.7.1 Protein Synthesis ribosomal proteins	0.477136	1.39198	↑		0.385356	1.22024	Down	-0.287163	CD0105
156	gi115249081	CD0077	CAJ66892.1	rpsS	30S ribosomal protein S19	30S ribosomal protein S19	3.7.1 Protein Synthesis ribosomal proteins	10.61	10.1	Unknown	Yes AMN-AS 23-24	Yes 0.762249	97	3	26	0.25	0.778279	0.304091	12	165	65	2	35	0.166667	0.467799	0.254425	12	0.836674	CD0077	30S ribosomal protein S19	3.7.1 Protein Synthesis ribosomal proteins	-0.257262	1.19521	↓		0.387954	1.31878	Up	0.399209	CD0077
124	gi115249703	CD0687	CAJ67520.1	rplT	50S ribosomal protein L20	50S ribosomal protein L20	3.7.1 Protein Synthesis ribosomal proteins	13.47	11.4	Unknown	Yes RPA-NT 35-36	No	152	3	22	0.166667	0.467799	0.18278	18	203	42	1	13	0.0555556	0.136464	0.0742195	18	0.40606	CD0687	50S ribosomal protein L20	3.7.1 Protein Synthesis ribosomal proteins	-1.30024	2.46269	↓↓		0.409643	1.17754	Down	-0.235777	CD0687
121	gi115249082	CD0078	CAJ66893.1	rplV	50S ribosomal protein L22	50S ribosomal protein L22	3.7.1 Protein Synthesis ribosomal proteins	12.25	10.3	Cytoplasmic	No	No	157	3	26	0.166667	0.467799	0.18278	18	109	125	3	19	0.166667	0.467799	0.254425	18	1.39198	CD0078	50S ribosomal protein L22	3.7.1 Protein Synthesis ribosomal proteins	0.477136	1.39198	↑		0.410898	1.24947	Up	0.321313	CD0078
101	gi115249112	CD0104	CAJ66923.1	rplM	50S ribosomal protein L13	50S ribosomal protein L13	3.7.1 Protein Synthesis ribosomal proteins	16.2	9.81	Unknown	No	No	183	4	40	0.333333	1.15443	0.451064	12	105	132	3	25	0.25	0.778279	0.423289	12	0.938423	CD0104	50S ribosomal protein L13	3.7.1 Protein Synthesis ribosomal proteins	-0.0916902	1.06562	↓		0.467373	1.20436	Down	-0.268265	CD0104
154	gi115249107	CD0099	CAJ66918.1	rplQ	50S ribosomal protein L17	50S ribosomal protein L17	3.7.1 Protein Synthesis ribosomal proteins	12.97	10.4	Cytoplasmic	No	No	101	3	24	0.157895	0.43845	0.171312	19	151	74	2	13	0.105263	0.274275	0.149172	19	0.87076	CD0099	50S ribosomal protein L17	3.7.1 Protein Synthesis ribosomal proteins	-0.199653	1.14842	↓		0.470364	1.1587	Down	-0.212512	CD0099
123	gi115249083	CD0079	CAJ66894.1	rpsC	30S ribosomal protein S3	30S ribosomal protein S3	3.7.1 Protein Synthesis ribosomal proteins	30.37	10.3	Cytoplasmic	No	No	152	2	11	0.0666667	0.165914	0.0648265	30	125	99	2	11	0.0666667	0.165914	0.0902371	30	1.39198	CD0079	30S ribosomal protein S3	3.7.1 Protein Synthesis ribosomal proteins	0.477136	1.39198	↑		0.524276	1.157	Up	0.210384	CD0079
176	gi115250352	CD1316	CAJ68174.1	rpsO	30S ribosomal protein S15	30S ribosomal protein S15	3.7.1 Protein Synthesis ribosomal proteins	9.73	10.1	Cytoplasmic	No	No	73	2	29	0.142857	0.389495	0.152185	14	103	135	3	39	0.214286	0.637894	0.346936	14	2.2797	CD1316	30S ribosomal protein S15	3.7.1 Protein Synthesis ribosomal proteins	1.18885	2.2797	↑↑		0.620444	1.18369	Up	0.24329	CD1316
71	gi115249078	CD0074	CAJ66889.1	rplD	50S ribosomal protein L4	50S ribosomal protein L4	3.7.1 Protein Synthesis ribosomal proteins	23.77	9.96	Unknown	No	Yes 0.634191	284	6	28	0.24	0.737801	0.288276	25	164	66	1	6	0.04	0.0964782	0.0524723	25	0.182021	CD0074	50S ribosomal protein L4	3.7.1 Protein Synthesis ribosomal proteins	-2.45782	5.49386	↓↓		0.633935	1.12436	Up	0.169099	CD0074
74	gi115249076	CD0072	CAJ66887.1	rpsJ	30S ribosomal protein S10	30S ribosomal protein S10	3.7.1 Protein Synthesis ribosomal proteins	11.7	9.89	Unknown	No	Yes 0.562771	276	5	39	0.3125	1.05353	0.411636	16	57	245	5	39	0.3125	1.05353	0.572988	16	1.39198	CD0072	30S ribosomal protein S10	3.7.1 Protein Synthesis ribosomal proteins	0.477136	1.39198	↑		0.640496	1.15577	Down	-0.208851	CD0072
78	gi115249065	CD0061	CAJ66876.1	rplK	50S ribosomal protein L11	50S ribosomal protein L11	3.7.1 Protein Synthesis ribosomal proteins	14.79	9.89	Unknown	No	No	257	5	34	0.333333	1.15443	0.451064	15	76	173	4	34	0.266667	0.84785	0.461126	15	1.02231	CD0061	50S ribosomal protein L11	3.7.1 Protein Synthesis ribosomal proteins	0.0318303	1.02231	↑		0.656338	1.04347	Down	-0.061384	CD0061
133	gi115250291	CD1257	CAJ68113.1	rplS	50S ribosomal protein L19	50S ribosomal protein L19	3.7.1 Protein Synthesis ribosomal proteins	13.3	10.8	Unknown	No	No	135	3	26	0.142857	0.389495	0.152185	21	122	103	3	26	0.142857	0.389495	0.211838	21	1.39198	CD1257	50S ribosomal protein L19	3.7.1 Protein Synthesis ribosomal proteins	0.477136	1.39198	↑		0.656449	1.22522	Up	0.293044	CD1257
153	gi115252728	CD3663	CAJ70572.1	rpsF	30S ribosomal protein S6	30S ribosomal protein S6	3.7.1 Protein Synthesis ribosomal proteins	10.55	7.24	Cytoplasmic	No	No	102	2	32	0.142857	0.389495	0.152185	14	90	159	3	32	0.214286	0.637894	0.346936	14	2.2797	CD3663	30S ribosomal protein S6	3.7.1 Protein Synthesis ribosomal proteins	1.18885	2.2797	↑↑		0.663455	1.13029	Up	0.176693	CD3663
98	gi115249080	CD0076	CAJ66891.1	rplB	50S ribosomal protein L2	50S ribosomal protein L2	3.7.1 Protein Synthesis ribosomal proteins	29.89	10.6	Unknown	No	No	205	4	19	0.153846	0.425103	0.166097	26	190	50	1	4	0.0384615	0.0926009	0.0503635	26	0.303217	CD0076	50S ribosomal protein L2	3.7.1 Protein Synthesis ribosomal proteins	-1.72158	3.29797	↓↓		0.671055	1.11889	Up	0.162067	CD0076
122	gi115249079	CD0075	CAJ66890.1	rplW	50S ribosomal protein L23	50S ribosomal protein L23	3.7.1 Protein Synthesis ribosomal proteins	10.8	9.66	Cytoplasmic	No	No	152	4	50	0.285714	0.930698	0.363645	14	98	137	3	26	0.214286	0.637894	0.346936	14	0.954052	CD0075	50S ribosomal protein L23	3.7.1 Protein Synthesis ribosomal proteins	-0.0678604	1.04816	↓		0.723173	1.09954	Up	0.136906	CD0075
87	gi115251499	CD2446	CAJ69332.1	rpsU	putative tRNA binding protein (GatB/Yqey)	putative tRNA binding protein (GatB/Yqey)	3.7.1 Protein Synthesis ribosomal proteins	17.08	6.89	Cytoplasmic	No	No	232	5	31	0.2	0.584893	0.228531	25	51	270	6	36	0.24	0.737801	0.401273	25	1.75588	CD2446	putative tRNA binding protein (GatB/Yqey)	3.7.1 Protein Synthesis ribosomal proteins	0.812194	1.75588	↑↑		0.815235	1.05545	Up	0.0778588	CD2446
199	gi115250287	CD1253	CAJ68109.1	rpsP	30S ribosomal protein S16	30S ribosomal protein S16	3.7.1 Protein Synthesis ribosomal proteins	10.25	10	Cytoplasmic	No	Yes 0.611549	57	1	16	0.0714286	0.178769	0.069849	14	159	69	1	16	0.0714286	0.178769	0.0972282	14	1.39198	CD1253	30S ribosomal protein S16	3.7.1 Protein Synthesis ribosomal proteins	0.477136	1.39198	↑		0.82197	1.0756	Up	0.105146	CD1253
56	gi115249077	CD0073	CAJ66888.1	rplC	50S ribosomal protein L3	50S ribosomal protein L3	3.7.1 Protein Synthesis ribosomal proteins	22.33	9.95	Cytoplasmic	No	No	358	7	38	0.21875	0.654817	0.255852	32	95	146	3	15	0.09375	0.240938	0.131041	32	0.512174	CD0073	50S ribosomal protein L3	3.7.1 Protein Synthesis ribosomal proteins	-0.965295	1.95246	↓↓		0.829054	1.06959	Up	0.0970536	CD0073
25	gi115249073	CD0069	CAJ66884.1		30S ribosomal protein S7	30S ribosomal protein S7	3.7.1 Protein Synthesis ribosomal proteins	17.67	9.92	Cytoplasmic	No	No	623	10	52	0.5	2.16228	0.844851	20	31	488	7	40	0.35	1.23872	0.673712	20	0.797433	CD0069	30S ribosomal protein S7	3.7.1 Protein Synthesis ribosomal proteins	-0.326564	1.25402	↓		0.989333	1.00386	Down	-0.00555708	CD0069
64	gi115249068	CD0064	CAJ66879.1	rplL	50S ribosomal protein L7/L12	50S ribosomal protein L7/L12	3.7.1 Protein Synthesis ribosomal proteins	12.62	4.76	Cytoplasmic	No	No	319	6	54	0.4	1.51189	0.590728	15	67	207	4	48	0.266667	0.84785	0.461126	15	0.780606	CD0064	50S ribosomal protein L7/L12	3.7.1 Protein Synthesis ribosomal proteins	-0.357333	1.28106	↓		0.992077	1.00253	Up	0.00365174	CD0064
142	gi115251194	CD2140	CAJ69025.1	rpsB	30S ribosomal protein S2	30S ribosomal protein S2	3.7.1 Protein synthesis, ribosomal proteins	26.85	6.58	Cytoplasmic	No	No	120	2	10	0.0952381	0.245197	0.0958041	21	175	58	1	5	0.047619	0.115884	0.0630267	21	0.657871	CD2140	30S ribosomal protein S2	3.7.1 Protein synthesis, ribosomal proteins	-0.604124	1.52006	↓↓		0.685637	1.08188	Down	-0.113536	CD2140
89	gi115251299	CD2245	CAJ69130.1	asnC	asparaginyl-tRNA synthetase	asparaginyl-tRNA synthetase	3.7.2 Aminoacyl-tRNA synthetases	53.83	5.11	Cytoplasmic	No	No	228	4	11	0.105263	0.274275	0.107165	38	72	187	4	11	0.105263	0.274275	0.149172	38	1.39198	CD2245	asparaginyl-tRNA synthetase	3.7.2 Aminoacyl-tRNA synthetases	0.477136	1.39198	↑		0.0100527	2.10536	Up	1.07407	CD2245
7	gi115249053	CD0050	CAJ66864.1		putative dual-specificity prolyl/cysteinyl-tRNA synthetase	putative dual-specificity prolyl/cysteinyl-tRNA synthetase	3.7.2 Aminoacyl-tRNA synthetases	55.15	5.41	Cytoplasmic	No	No	1107	22	49	0.628571	3.25179	1.27055	35	17	703	14	32	0.4	1.51189	0.822281	35	0.647187	CD0050	putative dual-specificity prolyl/cysteinyl-tRNA synthetase	3.7.2 Aminoacyl-tRNA synthetases	-0.627746	1.54515	↓↓		0.0573809	1.44042	Down	-0.526493	CD0050
94	gi115249589	CD0574	CAJ67406.1	thrS	threonyl-tRNA synthetase	threonyl-tRNA synthetase	3.7.2 Aminoacyl-tRNA synthetases	73.55	5.44	Cytoplasmic	No	No	212	5	11	0.0847458	0.215474	0.0841907	59	113	117	2	5	0.0338983	0.0811808	0.0441524	59	0.524433	CD0574	threonyl-tRNA synthetase	3.7.2 Aminoacyl-tRNA synthetases	-0.93117	1.90682	↓↓		0.163956	1.41553	Down	-0.501339	CD0574
205	gi115251486	CD2433	CAJ69319.1	glyQ	glycyl-tRNA synthetase alpha chain	glycyl-tRNA synthetase alpha chain	3.7.2 Aminoacyl-tRNA synthetases	33.86	4.71	Cytoplasmic	No	No	56	1	5	0.0666667	0.165914	0.0648265	15	176	58	1	5	0.0666667	0.165914	0.0902371	15	1.39198	CD2433	glycyl-tRNA synthetase alpha chain	3.7.2 Aminoacyl-tRNA synthetases	0.477136	1.39198	↑		0.238672	1.3027	Down	-0.381502	CD2433
113	gi115251575	CD2521	CAJ69408.1	leuS	leucyl-tRNA synthetase	leucyl-tRNA synthetase	3.7.2 Aminoacyl-tRNA synthetases	92.44	5.26	Cytoplasmic	No	No	165	3	4	0.05	0.122018	0.0476754	60	71	191	4	7	0.0666667	0.165914	0.0902371	60	1.89274	CD2521	leucyl-tRNA synthetase	3.7.2 Aminoacyl-tRNA synthetases	0.920476	1.89274	↑↑		0.293227	1.11494	Down	-0.156965	CD2521
88	gi115251485	CD2432	CAJ69318.1	glyS	glycyl-tRNA synthetase beta chain	glycyl-tRNA synthetase beta chain	3.7.2 Aminoacyl-tRNA synthetases	78.48	5.05	Cytoplasmic	No	No	231	5	8	0.0769231	0.193777	0.0757129	65	68	206	4	6	0.0615385	0.152228	0.0827934	65	1.09352	CD2432	glycyl-tRNA synthetase beta chain	3.7.2 Aminoacyl-tRNA synthetases	0.128976	1.09352	↑		0.312873	1.55167	Down	-0.633821	CD2432
114	gi115249716	CD0700	CAJ67533.1	pheT	phenylalanyl-tRNA synthetase beta chain	phenylalanyl-tRNA synthetase beta chain	3.7.2 Aminoacyl-tRNA synthetases	89.24	4.99	Cytoplasmic	No	No	164	3	6	0.047619	0.115884	0.0452785	63	101	136	3	5	0.047619	0.115884	0.0630267	63	1.39198	CD0700	phenylalanyl-tRNA synthetase beta chain	3.7.2 Aminoacyl-tRNA synthetases	0.477136	1.39198	↑		0.402688	1.26424	Up	0.338273	CD0700
43	gi115251669	CD2618	CAJ69504.1	ileS	isoleucyl-tRNA synthetase	isoleucyl-tRNA synthetase	3.7.2 Aminoacyl-tRNA synthetases	119.72	5.19	Cytoplasmic	No	No	433	9	13	0.142857	0.389495	0.152185	63	70	192	5	6	0.0793651	0.200508	0.109052	63	0.716575	CD2618	isoleucyl-tRNA synthetase	3.7.2 Aminoacyl-tRNA synthetases	-0.48081	1.39553	↓		0.445887	1.06461	Down	-0.0903215	CD2618
66	gi115252312	CD3256	CAJ70153.1	valS	valyl-tRNA synthetase	valyl-tRNA synthetase	3.7.2 Aminoacyl-tRNA synthetases	103.01	5.27	Cytoplasmic	No	No	317	7	12	0.0985915	0.254849	0.0995754	71	87	160	3	5	0.0422535	0.102183	0.0555748	71	0.558117	CD3256	valyl-tRNA synthetase	3.7.2 Aminoacyl-tRNA synthetases	-0.841359	1.79174	↓↓		0.855993	1.05495	Up	0.0771798	CD3256
108	gi115250279	CD1246	CAJ68101.1	efp	elongation factor P	elongation factor P	3.7.4 Protein synthesis, elongation	20.89	5.06	Cytoplasmic	No	No	172	4	27	0.166667	0.467799	0.18278	24	184	54	1	4	0.0416667	0.100694	0.0547653	24	0.299624	CD1246	elongation factor P	3.7.4 Protein synthesis, elongation	-1.73877	3.33751	↓↓		0.032457	1.47982	Up	0.565422	CD1246
116	gi115249061	CD0058	CAJ66872.1	tuf1	elongation factor TU	elongation factor TU	3.7.4 Protein synthesis, elongation	44.03	5.04	Cytoplasmic	No	No	163	4	15	0.181818	0.519911	0.203141	22	112	122	3	10	0.136364	0.368875	0.200622	22	0.987602	CD0058	elongation factor TU	3.7.4 Protein synthesis, elongation	-0.0179986	1.01255	↓		0.154634	1.38449	Up	0.469358	CD0058
3	gi115249074	CD0070	CAJ66885.1		translation elongation factor G	translation elongation factor G	3.7.4 Protein synthesis, elongation	75.91	5	Cytoplasmic	No	No	1386	26	44	0.666667	3.64159	1.42285	39	2	1261	22	38	0.564103	2.66524	1.44956	39	1.01877	CD0070	translation elongation factor G	3.7.4 Protein synthesis, elongation	0.0268343	1.01877	↑		0.414655	1.19821	Down	-0.260877	CD0070
47	gi115251191	CD2137	CAJ69022.1	frr	ribosome recycling factor	ribosome recycling factor	3.7.5 Translation termination	21.11	7.39	Cytoplasmic	No	No	418	8	45	0.296296	0.978319	0.382251	27	56	256	6	36	0.222222	0.668101	0.363365	27	0.950591	CD2137	ribosome recycling factor	3.7.5 Translation termination	-0.0731034	1.05198	↓		0.385951	1.42607	Up	0.512042	CD2137
2	gi115251515	CD2461	CAJ69348.1	dnaK	chaperone protein DnaK	chaperone protein DnaK	3.9 Protein folding	66.48	4.85	Cytoplasmic	No	No	1442	22	42	0.4	1.51189	0.590728	55	3	1259	21	44	0.381818	1.4089	0.766267	55	1.29716	CD2461	chaperone protein DnaK	3.9 Protein folding	0.375352	1.29716	↑		0.0201	2.18645	Up	1.12859	CD2461
90	gi115249203	CD0193	CAJ67015.1	groS	10 kDa chaperonin (GroES)	10 kDa chaperonin (GroES)	3.9 Protein folding	10.22	5.04	Cytoplasmic	No	No	224	4	52	0.333333	1.15443	0.451064	12	41	342	6	59	0.5	2.16228	1.17601	12	2.6072	CD0193	10 kDa chaperonin (GroES)	3.9 Protein folding	1.3825	2.6072	↑↑		0.0207	2.04323	Up	1.03085	CD0193
84	gi115252362	CD3306	CAJ70203.1	tig	trigger factor	trigger factor	3.9 Protein folding	48.19	4.62	Cytoplasmic	No	No	243	6	23	0.146341	0.400688	0.156558	41	181	56	1	4	0.0243902	0.0577676	0.0314185	41	0.200683	CD3306	trigger factor	3.9 Protein folding	-2.31701	4.98299	↓↓		0.0347361	1.57223	Down	-0.652809	CD3306
11	gi115249204	CD0194	CAJ67016.1	groel	60 kDa chaperonin	60 kDa chaperonin	3.9 Protein folding	57.78	4.81	Cytoplasmic	No	No	980	16	41	0.390244	1.45609	0.568927	41	10	857	15	33	0.365854	1.32195	0.718981	41	1.26375	CD0194	60 kDa chaperonin	3.9 Protein folding	0.337711	1.26375	↑		0.0495952	2.61134	Up	1.38479	CD0194
27	gi115249282	CD0273	CAJ67095.1	htpG	chaperone protein (heat shock protein) HtpG, HSP90	chaperone protein (heat shock protein) HtpG, HSP90	3.9 Protein folding	74.93	4.99	Cytoplasmic	No	No	611	12	25	0.193548	0.561523	0.2194	62	21	658	12	23	0.193548	0.561523	0.3054	62	1.39198	CD0273	chaperone protein (heat shock protein) HtpG, HSP90	3.9 Protein folding	0.477136	1.39198	↑		0.145533	2.02909	Up	1.02083	CD0273
188	gi115251074	CD2020	CAJ68905.1	clpB	chaperone clpB	chaperone clpB	3.9 Protein folding	97.68	5.47	Cytoplasmic	No	No	63	1	2	0.0121951	0.0284783	0.0111271	82	124	101	3	4	0.0365854	0.087891	0.0478019	82	4.29599	CD2020	chaperone clpB	3.9 Protein folding	2.10299	4.29599	↑↑		0.196229	3.17745	Up	1.66787	CD2020
82	gi115252361	CD3305	CAJ70202.1	clpP1	ATP-dependent Clp protease proteolytic subunit	ATP-dependent Clp protease proteolytic subunit	3.9 Protein folding	21.3	5.28	Cytoplasmic	No	No	254	5	23	0.5	2.16228	0.844851	10	44	296	6	26	0.6	2.98107	1.62134	10	1.91908	CD3305	ATP-dependent Clp protease proteolytic subunit	3.9 Protein folding	0.940415	1.91908	↑↑		0.238672	1.16591	Down	-0.221458	CD3305
39	gi115250843	CD1797	CAJ68667.1		Coenzyme A disulfide reductase (CoA-disulfide reductase) (CoADR)	Coenzyme A disulfide reductase (CoA-disulfide reductase) (CoADR)	4.1 Adaptation to atypical conditions	58.7	5.65	Cytoplasmic	No	No	465	9	22	0.5	2.16228	0.844851	18	23	629	11	22	0.611111	3.08424	1.67745	18	1.9855	CD1797	Coenzyme A disulfide reductase (CoA-disulfide reductase) (CoADR)	4.1 Adaptation to atypical conditions	0.989499	1.9855	↑↑		0.0454305	1.37269	Down	-0.457005	CD1797
119	gi115250391	CD1355	CAJ68213.1	cspB	putative cold shock protein CspB	putative cold shock protein CspB	4.1 Adaptation to atypical conditions	7.12	4.77	Cytoplasmic	No	No	159	2	39	0.4	1.51189	0.590728	5	94	148	2	39	0.4	1.51189	0.822281	5	1.39198	CD1355	putative cold shock protein CspB	4.1 Adaptation to atypical conditions	0.477136	1.39198	↑		0.204766	1.61075	Down	-0.687729	CD1355
79	gi115251501	CD2447	CAJ69334.1		histidine triad nucleotide-binding protein	histidine triad nucleotide-binding protein	4.1 Adaptation to atypical conditions	13.06	6.63	Cytoplasmic	No	No	255	4	46	0.4	1.51189	0.590728	10	60	237	4	46	0.4	1.51189	0.822281	10	1.39198	CD2447	histidine triad nucleotide-binding protein	4.1 Adaptation to atypical conditions	0.477136	1.39198	↑		0.298675	1.04944	Up	0.0696153	CD2447
112	gi115250675	CD1634	CAJ68499.1	terD	tellurium resistance protein	tellurium resistance protein	4.2 Detoxification	20.76	4.7	Unknown	No	Yes 0.618172	166	2	15	0.2	0.584893	0.228531	10	93	150	2	15	0.2	0.584893	0.31811	10	1.39198	CD1634	tellurium resistance protein	4.2 Detoxification	0.477136	1.39198	↑		0.027033	1.25733	Up	0.330364	CD1634
179	gi115250845	CD1799	CAJ68669.1	terD	tellurium resistance protein	tellurium resistance protein	4.2 Detoxification	21.17	4.75	Unknown	No	No	70	1	9	0.0909091	0.232847	0.0909785	11	120	111	1	9	0.0909091	0.232847	0.12664	11	1.39198	CD1799	tellurium resistance protein	4.2 Detoxification	0.477136	1.39198	↑		0.185779	1.56723	Up	0.648221	CD1799
86	gi115250676	CD1635	CAJ68500.1	terD	tellurium resistance protein	tellurium resistance protein	4.2 Detoxification	21.53	4.66	Cytoplasmic	No	No	235	3	24	0.3	0.995262	0.388872	10	104	133	2	13	0.2	0.584893	0.31811	10	0.818034	CD1635	tellurium resistance protein	4.2 Detoxification	-0.289767	1.22244	↓		0.244998	1.27516	Up	0.350676	CD1635
38	gi115251734	CD2683	CAJ69569.1		putative propanediol utilization protein	putative propanediol utilization protein	4.2 Detoxification	20.07	6.42	Cytoplasmic	No	No	471	10	51	0.588235	2.87468	1.1232	17	58	244	5	29	0.294118	0.968419	0.526701	17	0.468929	CD2683	putative propanediol utilization protein	4.2 Detoxification	-1.09256	2.13252	↓↓		0.931784	1.03989	Down	-0.0564304	CD2683
49	gi115249997	CD0976	CAJ67817.1		putative phage protein	putative phage protein	4.4 Phage-related functions	16.98	5.12	Cytoplasmic	No	No	402	7	50	0.466667	1.92864	0.753565	15	59	240	4	30	0.266667	0.84785	0.461126	15	0.611926	CD0976	putative phage protein	4.4 Phage-related functions	-0.70857	1.63418	↓↓		0.314347	1.1388	Up	0.187513	CD0976
91	gi115252075	CD3018	CAJ69912.1		conserved hypothetical protein (putative redox-active protein)	conserved hypothetical protein (putative redox-active protein)	5.2 Similar to unknown proteins from other organisms	17.39	6.89	Cytoplasmic	No	No	220	4	37	0.235294	0.719072	0.280958	17	111	125	3	17	0.176471	0.501311	0.272652	17	0.970436	CD3018	conserved hypothetical protein (putative redox-active protein)	5.2 Similar to unknown proteins from other organisms	-0.0432953	1.03046	↓		0.0607031	2.21166	Up	1.14513	CD3018
54	gi115251115	CD2061	CAJ68946.1		conserved hypothetical protein DUF1121 family, YkgG family, COG1556	conserved hypothetical protein DUF1121 family, YkgG family, COG1556	5.2 Similar to unknown proteins from other organisms	23.86	7.89	Cytoplasmic	No	No	377	7	28	0.241379	0.743329	0.290435	29	50	275	5	25	0.172414	0.487352	0.26506	29	0.912629	CD2061	conserved hypothetical protein DUF1121 family, YkgG family, COG1556	5.2 Similar to unknown proteins from other organisms	-0.1319	1.09574	↓		0.175704	1.66013	Up	0.731299	CD2061
191	gi115251678	CD2627	CAJ69513.1		conserved hypothetical protein	conserved hypothetical protein	5.2 Similar to unknown proteins from other organisms	10.19	5.48	Cytoplasmic	No	No	61	1	12	0.1	0.258925	0.101168	10	161	68	1	12	0.1	0.258925	0.140824	10	1.39198	CD2627	conserved hypothetical protein	5.2 Similar to unknown proteins from other organisms	0.477136	1.39198	↑		0.238672	1.62727	Up	0.702454	CD2627
204	gi115251448	CD2396	CAJ69281.1		conserved hypothetical protein	conserved hypothetical protein	5.2 Similar to unknown proteins from other organisms	19.59	5.15	Unknown	No	No	56	1	6	0.142857	0.389495	0.152185	7	202	43	1	7	0.142857	0.389495	0.211838	7	1.39198	CD2396	conserved hypothetical protein	5.2 Similar to unknown proteins from other organisms	0.477136	1.39198	↑		0.260536	1.89355	Up	0.921097	CD2396
162	gi115249020	CD0017	CAJ66831.1		conserved hypothetical protein (baB/EbfC DNA-binding family)	conserved hypothetical protein (baB/EbfC DNA-binding family)	5.2 Similar to unknown proteins from other organisms	12.38	5	Unknown	No	No	93	2	22	0.333333	1.15443	0.451064	6	140	81	2	22	0.333333	1.15443	0.627871	6	1.39198	CD0017	conserved hypothetical protein (baB/EbfC DNA-binding family)	5.2 Similar to unknown proteins from other organisms	0.477136	1.39198	↑		0.429635	1.39051	Down	-0.475614	CD0017
120	gi115249824	CD0807	CAJ67641.1		conserved hypothetical protein	conserved hypothetical protein	5.2 Similar to unknown proteins from other organisms	13.77	4.95	Cytoplasmic	No	No	158	3	38	0.25	0.778279	0.304091	12	166	65	1	12	0.0833333	0.211528	0.115045	12	0.378324	CD0807	conserved hypothetical protein	5.2 Similar to unknown proteins from other organisms	-1.40231	2.64324	↓↓		0.644721	1.19459	Up	0.256518	CD0807
106	gi115252732	CD3667	CAJ70576.1		conserved hypothetical protein (SirA family),	conserved hypothetical protein (SirA family),	5.2 Similar to unknown proteins from other organisms	22.17	4.94	Unknown	No	No	174	4	30	0.307692	1.03092	0.402803	13	195	49	1	7	0.0769231	0.193777	0.105391	13	0.261643	CD3667	conserved hypothetical protein (SirA family),	5.2 Similar to unknown proteins from other organisms	-1.93433	3.822	↓↓		0.826477	1.06948	Up	0.0969063	CD3667
183	gi115251487	CD2434	CAJ69320.1		conserved hypothetical protein	conserved hypothetical protein	5.2 Similar to unknown proteins from other organisms	22.23	4.88	Cytoplasmic	No	No	66	1	5	0.0384615	0.0926009	0.0361813	26	131	92	2	9	0.0769231	0.193777	0.105391	26	2.91285	CD2434	conserved hypothetical protein	5.2 Similar to unknown proteins from other organisms	1.54243	2.91285	↑↑		0.945559	1.02569	Down	-0.0365995	CD2434
													60153	1090	4496						48199	887	3685
													337.938	6.1236	25.2584						270.781	4.98315	20.7022
